# Supplementary material for: A genome-wide approach for identification and characterisation of metabolite-inducible systems
Source: PubMed Central journal article supplement (PMC7057948; doi:10.1038/s41467-020-14941-6), 2020-03-05
Supplement: 41467_2020_14941_MOESM1_ESM.pdf [file 41467_2020_14941_MOESM1_ESM.pdf]

## Supplementary Information

### A genome-wide approach for identification and characterisation of metabolite-inducible systems

Erik K. R. Hanko<sup>1</sup>, Ana C. Paiva<sup>2</sup>, Magdalena Jonczyk<sup>1</sup>, Matthew Abbott<sup>1</sup>, Nigel P. Minton<sup>1</sup>, and Naglis Malys<sup>1\*</sup>

<sup>1</sup>BBSRC/EPSRC Synthetic Biology Research Centre (SBRC), School of Life Sciences, The University of Nottingham, Nottingham, NG7 2RD, United Kingdom

<sup>2</sup>Centre for Biomolecular Sciences, School of Life Sciences, The University of Nottingham, Nottingham, NG7 2RD, United Kingdom

\*Author to whom correspondence should be addressed; E-Mail: [n.malys@gmail.com](mailto:n.malys@gmail.com)

## Supplementary Methods

### Construction of plasmids

pEH197 was constructed by restriction enzyme-based cloning. Oligonucleotide primers EH344\_f and EH345\_r were used to amplify the tetracycline resistance marker from pME6000, and cloned into pEH010 by PmeI and AscI restriction sites.

pEH035 was constructed by restriction enzyme-based cloning. Oligonucleotide primers EH097\_r and EH098\_f were used to amplify the putative 3-hydroxypropanoate-inducible promoter from *C. necator* H16 genomic DNA, and cloned into pEH006 by AatII and NdeI restriction sites.

pEH198 was constructed by restriction enzyme-based cloning. Oligonucleotide primers EH344\_f and EH345\_r were used to amplify the tetracycline resistance marker from pME6000, and cloned into pEH035 by PmeI and AscI restriction sites.

pEH161 was constructed by restriction enzyme-based cloning. Oligonucleotide primers EH289\_r and EH290\_f were used to amplify the putative 3,4-dihydroxybenzoate-inducible system from *C. necator* H16 genomic DNA, and cloned into pEH006 by AatII and NdeI restriction sites.

pEH216 was constructed by restriction enzyme-based cloning. Oligonucleotide primers EH344\_f and EH345\_r were used to amplify the tetracycline resistance marker from pME6000, and cloned into pEH161 by PmeI and AscI restriction sites.

pEH171 was constructed by restriction enzyme-based cloning. Oligonucleotide primers EH301\_r and EH290\_f were used to amplify the putative 3,4-dihydroxybenzoate-inducible promoter from *C. necator* H16 genomic DNA, and cloned into pEH006 by AatII and NdeI restriction sites.

pEH217 was constructed by restriction enzyme-based cloning. Oligonucleotide primers EH344\_f and EH345\_r were used to amplify the tetracycline resistance marker from pME6000, and cloned into pEH171 by PmeI and AscI restriction sites.

pEH052 was constructed by using the NEBuilder Hifi DNA assembly method. Oligonucleotide primers EH133\_r and EH134\_f, EH135\_r and EH136\_f, EH051\_r and EH015\_f were used to amplify *acoR* and the acetoin-inducible promoter from *C. necator* H16 genomic DNA, and the vector backbone from pEH006.

pEH222 was constructed by restriction enzyme-based cloning. Oligonucleotide primers EH344\_f and EH345\_r were used to amplify the tetracycline resistance marker from pME6000, and cloned into pEH052 by PmeI and FseI restriction sites.

pEH096 was constructed by restriction enzyme-based cloning. Oligonucleotide primers EH211\_r and EH212\_f were used to amplify the acetoin-inducible promoter from *C. necator* H16 genomic DNA, and cloned into pEH006 by AatII and NdeI restriction sites.

pEH201 was constructed by restriction enzyme-based cloning. Oligonucleotide primers EH344\_f and EH345\_r were used to amplify the tetracycline resistance marker from pME6000, and cloned into pEH096 by PmeI and AscI restriction sites.

pEH148 was constructed by restriction enzyme-based cloning. Oligonucleotide primers N36\_f and N38\_r were used to amplify the putative benzoate-inducible system from *C. necator* H16 genomic DNA, and cloned into pEH006 by AatII and NdeI restriction sites.

pEH205 was constructed by restriction enzyme-based cloning. Oligonucleotide primers EH344\_f and EH345\_r were used to amplify the tetracycline resistance marker from pME6000, and cloned into pEH148 by PmeI and AscI restriction sites.

pEH149 was constructed by restriction enzyme-based cloning. Oligonucleotide primers N37\_f and N38\_r were used to amplify the putative benzoate-inducible promoter from *C. necator* H16 genomic DNA, and cloned into pEH006 by AatII and NdeI restriction sites.

pEH206 was constructed by restriction enzyme-based cloning. Oligonucleotide primers EH344\_f and EH345\_r were used to amplify the tetracycline resistance marker from pME6000, and cloned into pEH149 by PmeI and AscI restriction sites.

pEH147 was constructed by restriction enzyme-based cloning. Oligonucleotide primers N31\_r and N30\_f were used to amplify the putative  $\beta$ -alanine-inducible system from *C. necator* H16 genomic DNA, and cloned into pEH006 by AatII and NdeI restriction sites.

pEH221 was constructed by restriction enzyme-based cloning. Oligonucleotide primers EH344\_f and EH345\_r were used to amplify the tetracycline resistance marker from pME6000, and cloned into pEH147 by PmeI and FseI restriction sites.

pEH101 was constructed by restriction enzyme-based cloning. Oligonucleotide primers N31\_r and EH217\_f were used to amplify the putative  $\beta$ -alanine-inducible promoter from *C. necator* H16 genomic DNA, and cloned into pEH006 by AatII and NdeI restriction sites.

pEH196 was constructed by restriction enzyme-based cloning. Oligonucleotide primers EH344\_f and EH345\_r were used to amplify the tetracycline resistance marker from pME6000, and cloned into pEH101 by PmeI and AscI restriction sites.

pEH173 was constructed by restriction enzyme-based cloning. The  $\beta$ -alanine-inducible system which was optimised for *E. coli* codon usage was cut from p17ACKHEP and cloned into pEH006 by AatII and NdeI restriction sites.

pEH225 was constructed by restriction enzyme-based cloning. Oligonucleotide primers N30\_f and N39\_r were used to amplify *oapR* gene from pEH147 plasmid DNA with the core sequence of constitutive promoter  $P_{13}$  including the phage T7 gene 10 RBS, and cloned into pEH147 by AatII and BsrGI restriction sites.

pEH234 was constructed by restriction enzyme-based cloning. Oligonucleotide primers EH344\_f and EH345\_r were used to amplify the tetracycline resistance marker from pME6000, and cloned into pEH225 by PmeI and FseI restriction sites.

pEH226 was constructed by restriction enzyme-based cloning. Oligonucleotide primers N30\_f and N40\_r were used to amplify *oapR* gene optimised for *E. coli* codon usage from p17ACKHEP plasmid DNA with the core sequence of constitutive promoter  $P_{13}$  including the phage T7 gene 10 RBS, and cloned into pEH147 by AatII and BsrGI restriction sites.

pEH235 was constructed by restriction enzyme-based cloning. Oligonucleotide primers EH344\_f and EH345\_r were used to amplify the tetracycline resistance marker from pME6000, and cloned into pEH226 by PmeI and AscI restriction sites.

pEH159 was constructed by restriction enzyme-based cloning. Oligonucleotide primers EH285\_r and EH286\_f were used to amplify the putative cyclohexanecarboxylate-inducible system from *C. necator* H16 genomic DNA, and cloned into pEH006 by AatII and NdeI restriction sites.

pEH214 was constructed by restriction enzyme-based cloning. Oligonucleotide primers EH344\_f and EH345\_r were used to amplify the tetracycline resistance marker from pME6000, and cloned into pEH159 by PmeI and AscI restriction sites.

pEH170 was constructed by restriction enzyme-based cloning. Oligonucleotide primers EH300\_r and EH286\_f were used to amplify the putative cyclohexanecarboxylate-inducible promoter from *C. necator* H16 genomic DNA, and cloned into pEH006 by AatII and NdeI restriction sites.

pEH215 was constructed by restriction enzyme-based cloning. Oligonucleotide primers EH344\_f and EH345\_r were used to amplify the tetracycline resistance marker from pME6000, and cloned into pEH170 by PmeI and AscI restriction sites.

pEH134 was constructed by using the NEBuilder Hifi DNA assembly method. Oligonucleotide primers EH258\_r and EH259\_f were used to amplify the putative formate-inducible system from *C. necator* H16 genomic DNA. The PCR product was combined with AatII/NdeI digested pEH006.

pEH202 was constructed by restriction enzyme-based cloning. Oligonucleotide primers EH344\_f and EH345\_r were used to amplify the tetracycline resistance marker from pME6000, and cloned into pEH134 by PmeI and AscI restriction sites.

pEH151 was constructed by using the NEBuilder Hifi DNA assembly method. Oligonucleotide primers EH272\_r and EH259\_f were used to amplify the putative formate-inducible promoter from *C. necator* H16 genomic DNA. The PCR product was combined with AatII/NdeI digested pEH006.

pEH203 was constructed by restriction enzyme-based cloning. Oligonucleotide primers EH344\_f and EH345\_r were used to amplify the tetracycline resistance marker from pME6000, and cloned into pEH151 by PmeI and AscI restriction sites.

pEH156 was constructed by using the NEBuilder Hifi DNA assembly method. Oligonucleotide primers EH279\_r and EH280\_f were used to amplify the putative GABA-inducible system from *C. necator* H16 genomic DNA. The PCR product was combined with AatII/NdeI digested pEH006.

pEH256 was constructed by using the NEBuilder Hifi DNA assembly method. Oligonucleotide primers EH397\_r and EH398\_f were used to amplify the putative GABA-inducible system, *H16\_RS23655*, and the intergenic region preceding *H16\_RS23660* from *C. necator* H16 genomic DNA. The PCR product was combined with AatII/NdeI digested pEH006.

pEH268 was constructed by using the NEBuilder Hifi DNA assembly method. Oligonucleotide primers EH441\_r and EH398\_f were used to amplify the putative GABA-inducible system, *H16\_RS23655*, and the intergenic region preceding *H16\_RS23660* from *C. necator* H16 genomic DNA. The PCR product was combined with AscI/NdeI digested pEH220.

pEH266 was constructed by restriction enzyme-based cloning. Oligonucleotide primers EH436\_f and EH435\_r were used to amplify the putative GABA-inducible promoter, *H16\_RS23655*, and the intergenic region preceding *H16\_RS23660* from *C. necator* H16 genomic DNA, and cloned into pEH006 by NdeI and AscI restriction sites.

pEH269 was constructed by restriction enzyme-based cloning. Oligonucleotide primers EH436\_f and EH435\_r were used to amplify the putative GABA-inducible promoter, *H16\_RS23655*, and the intergenic region preceding *H16\_RS23660* from *C. necator* H16 genomic DNA, and cloned into pEH220 by NdeI and AscI restriction sites.

pEH220 was constructed by restriction enzyme-based cloning. Oligonucleotide primers EH344\_f and EH345\_r were used to amplify the tetracycline resistance marker from pME6000, and cloned into pEH176 by PmeI and AscI restriction sites.

pEH160 was constructed by using the NEBuilder Hifi DNA assembly method. Oligonucleotide primers EH287\_r and EH288\_f were used to amplify the putative L-glutamine-inducible system from *C. necator* H16 genomic DNA. The PCR product was combined with AatII/NdeI digested pEH006.

pEH240 was constructed by using the NEBuilder Hifi DNA assembly method. Oligonucleotide primers EH360\_r and EH361\_f were used to amplify the putative L-glutamine-inducible system, *H16\_RS29650*, and the intergenic region preceding *H16\_RS29655* from *C. necator* H16 genomic DNA. The PCR product was combined with AatII/NdeI digested pEH006.

pEH137 was constructed by restriction enzyme-based cloning. Oligonucleotide primers EH264\_r and EH265\_f were used to amplify the putative L-phenylalanine-inducible system from *C. necator* H16 genomic DNA, and cloned into pEH006 by AatII and NdeI restriction sites.

pEH210 was constructed by restriction enzyme-based cloning. Oligonucleotide primers EH344\_f and EH345\_r were used to amplify the tetracycline resistance marker from pME6000, and cloned into pEH137 by PmeI and AscI restriction sites.

pEH153 was constructed by restriction enzyme-based cloning. Oligonucleotide primers EH274\_r and EH265\_f were used to amplify the putative L-phenylalanine-inducible promoter from *C. necator* H16 genomic DNA, and cloned into pEH006 by AatII and NdeI restriction sites.

pEH211 was constructed by restriction enzyme-based cloning. Oligonucleotide primers EH344\_f and EH345\_r were used to amplify the tetracycline resistance marker from pME6000, and cloned into pEH153 by PmeI and AscI restriction sites.

pEH155 was constructed by restriction enzyme-based cloning. Oligonucleotide primers EH277\_r and EH278\_f were used to amplify the putative phenylglyoxylate-inducible system from *C. necator* H16 genomic DNA, and cloned into pEH006 by AatII and NdeI restriction sites.

pEH218 was constructed by restriction enzyme-based cloning. Oligonucleotide primers EH344\_f and EH345\_r were used to amplify the tetracycline resistance marker from pME6000, and cloned into pEH155 by PmeI and AscI restriction sites.

pEH229 was constructed by restriction enzyme-based cloning. Oligonucleotide primers EH346\_r and EHseq026\_f were used to amplify the putative phenylglyoxylate-inducible promoter from pEH155, and cloned into pEH006 by AatII and NdeI restriction sites.

pEH257 was constructed by restriction enzyme-based cloning. The tetracycline resistance marker from pME6000 was cloned into pEH229 by AscI and PmeI restriction sites.

pEH042 was constructed by restriction enzyme-based cloning. Oligonucleotide primers EH118\_r and EH119\_f were used to amplify the putative salicylate-inducible system from *C. necator* H16 genomic DNA, and cloned into pEH006 by AscI and NdeI restriction sites.

pEH194 was constructed by restriction enzyme-based cloning. Oligonucleotide primers EH344\_f and EH345\_r were used to amplify the tetracycline resistance marker from pME6000, and cloned into pEH042 by PmeI and AscI restriction sites.

pEH095 was constructed by restriction enzyme-based cloning. Oligonucleotide primers EH210\_r and EH119\_f were used to amplify the putative salicylate-inducible promoter from *C. necator* H16 genomic DNA, and cloned into pEH006 by AatII and NdeI restriction sites.

pEH195 was constructed by restriction enzyme-based cloning. Oligonucleotide primers EH344\_f and EH345\_r were used to amplify the tetracycline resistance marker from pME6000, and cloned into pEH095 by PmeI and AscI restriction sites.

pEH157 was constructed by restriction enzyme-based cloning. Oligonucleotide primers EH281\_r and EH282\_f were used to amplify the putative sulfonatoacetate-inducible system from *C. necator* H16 genomic DNA, and cloned into pEH006 by AatII and NdeI restriction sites.

pEH224 was constructed by restriction enzyme-based cloning. Oligonucleotide primers EH344\_f and EH345\_r were used to amplify the tetracycline resistance marker from pME6000, and cloned into pEH157 by PmeI and FseI restriction sites.

pEH168 was constructed by restriction enzyme-based cloning. Oligonucleotide primers EH298\_r and EH282\_f were used to amplify the putative sulfonatoacetate-inducible promoter from *C. necator* H16 genomic DNA, and cloned into pEH006 by AatII and NdeI restriction sites.

pEH207 was constructed by restriction enzyme-based cloning. Oligonucleotide primers EH344\_f and EH345\_r were used to amplify the tetracycline resistance marker from pME6000, and cloned into pEH168 by PmeI and AscI restriction sites.

pEH083 was constructed by restriction enzyme-based cloning. Oligonucleotide primers EH182\_r and EH183\_f were used to amplify the putative tartrate-inducible system from *C. necator* H16 genomic DNA, and cloned into pEH006 by AscI and NdeI restriction sites.

pEH199 was constructed by restriction enzyme-based cloning. Oligonucleotide primers EH344\_f and EH345\_r were used to amplify the tetracycline resistance marker from pME6000, and cloned into pEH083 by PmeI and AscI restriction sites.

pEH097 was constructed by restriction enzyme-based cloning. Oligonucleotide primers EH213\_r and EH183\_f were used to amplify the putative tartrate-inducible promoter from *C. necator* H16 genomic DNA, and cloned into pEH006 by AatII and NdeI restriction sites.

pEH200 was constructed by restriction enzyme-based cloning. Oligonucleotide primers EH344\_f and EH345\_r were used to amplify the tetracycline resistance marker from pME6000, and cloned into pEH097 by PmeI and AscI restriction sites.

pEH136 was constructed by restriction enzyme-based cloning. Oligonucleotide primers EH262\_r and EH263\_f were used to amplify the putative L-kynurenine-inducible system from *C. necator* H16 genomic DNA, and cloned into pEH006 by AatII and NdeI restriction sites.

pEH208 was constructed by restriction enzyme-based cloning. Oligonucleotide primers EH344\_f and EH345\_r were used to amplify the tetracycline resistance marker from pME6000, and cloned into pEH136 by PmeI and AscI restriction sites.

pEH152 was constructed by restriction enzyme-based cloning. Oligonucleotide primers EH273\_r and EH263\_f were used to amplify the putative L-kynurenine-inducible promoter from *C. necator* H16 genomic DNA, and cloned into pEH006 by AatII and NdeI restriction sites.

pEH209 was constructed by restriction enzyme-based cloning. Oligonucleotide primers EH344\_f and EH345\_r were used to amplify the tetracycline resistance marker from pME6000, and cloned into pEH152 by PmeI and AscI restriction sites.

pEH158 was constructed by restriction enzyme-based cloning. Oligonucleotide primers EH283\_r and EH284\_f were used to amplify the putative L-tyrosine-inducible system from *C. necator* H16 genomic DNA, and cloned into pEH006 by AatII and NdeI restriction sites.

pEH212 was constructed by restriction enzyme-based cloning. Oligonucleotide primers EH344\_f and EH345\_r were used to amplify the tetracycline resistance marker from pME6000, and cloned into pEH158 by PmeI and AscI restriction sites.

pEH169 was constructed by restriction enzyme-based cloning. Oligonucleotide primers EH299\_r and EH284\_f were used to amplify the putative L-tyrosine-inducible promoter from *C. necator* H16 genomic DNA, and cloned into pEH006 by AatII and NdeI restriction sites.

pEH213 was constructed by restriction enzyme-based cloning. Oligonucleotide primers EH344\_f and EH345\_r were used to amplify the tetracycline resistance marker from pME6000, and cloned into pEH169 by PmeI and AscI restriction sites.

pEH154 was constructed by using the NEBuilder Hifi DNA assembly method. Oligonucleotide primers EH275\_r and EH276\_f were used to amplify the putative xanthine-inducible system from *C. necator* H16 genomic DNA. The PCR product was combined with AatII/NdeI digested pEH006.

pEH223 was constructed by restriction enzyme-based cloning. Oligonucleotide primers EH344\_f and EH345\_r were used to amplify the tetracycline resistance marker from pME6000, and cloned into pEH154 by PmeI and FseI restriction sites.

pEH167 was constructed by restriction enzyme-based cloning. Oligonucleotide primers EH297\_r and EH276\_f were used to amplify the putative xanthine-inducible promoter from *C. necator* H16 genomic DNA, and cloned into pEH006 by AatII and NdeI restriction sites.

pEH204 was constructed by restriction enzyme-based cloning. Oligonucleotide primers EH344\_f and EH345\_r were used to amplify the tetracycline resistance marker from pME6000, and cloned into pEH167 by PmeI and AscI restriction sites.

pEH263 was constructed by using the NEBuilder Hifi DNA assembly method. Oligonucleotide primers EH421\_f and EH415\_r, EH423\_f and EH422\_r, EH425\_f and EH424\_r, EH420\_f and EH426\_r were used to amplify *egfp*, the salicylate-inducible system, the 3,4-dihydroxybenzoate-inducible system and *rfp* from pJOE7801.1, pEH042, and pEH161. The PCR products were combined with AscI and SbfI digested pEH220.

pEH271 was constructed by restriction enzyme-based cloning. The  $\beta$ -alanine-inducible system from pEH147 was cloned into pEH165 by NdeI and AatII restriction sites.

pEH272 was constructed by restriction enzyme-based cloning. Oligonucleotide primers EH443\_f and EH442\_r were used to amplify *panD* from *Escherichia coli* MG1655 genomic DNA, and cloned into pEH271 by XbaI and SbfI restriction sites.

pEH273 was constructed by restriction enzyme-based cloning. Oligonucleotide primers EH445\_f and EH444\_r were used to amplify *panD* from *C. necator* H16 genomic DNA, and cloned into pEH271 by XbaI and SbfI restriction sites.

pEH274 was constructed by restriction enzyme-based cloning. Oligonucleotide primers EH447\_f and EH446\_r were used to amplify *panD* from *Corynebacterium glutamicum* ATCC13032 genomic DNA, and cloned into pEH271 by EcoRI and SbfI restriction sites.

pEH275 was constructed by restriction enzyme-based cloning. Oligonucleotide primers EH449\_f and EH448\_r were used to amplify *panD* from *Pseudomonas aeruginosa* PAO1 genomic DNA, and cloned into pEH271 by XbaI and SbfI restriction sites.

pEH276 was constructed by restriction enzyme-based cloning. Oligonucleotide primers EH451\_f and EH450\_r were used to amplify *panD* from *Synechocystis* sp. PCC6803 genomic DNA, and cloned into pEH271 by XbaI and SbfI restriction sites.

pEH277 was constructed by restriction enzyme-based cloning. Oligonucleotide primers EH453\_f and EH452\_r were used to amplify *panD* from *Bacillus megaterium* DSM319 genomic DNA, and cloned into pEH271 by XbaI and SbfI restriction sites.

DNA sequence of *oapR* optimised for *E. coli* codon usage

ATGCTGACCTGAATCTGACCCGTACACGTCGTGATGGTGATACCCTGACCGAGCAGATT  
GTTGCAGGTATTGCAGCACTGGTTGAACAGCGTGCCTGCGTGCAGGCACCGCACTGCC  
GAGCGTTCGTCGTTTTGCACAGCATCATCATGTTAGCACCTTTACCGTTGCCGAAGCCTAT  
GGTCGTCTGACCGCACTGGGTTATCTGGCAGCACGTCCTGGTAGCGGTTATACCGTTGCA  
CATCGTCATGCACCGGCAGGTCATGCCCGTGCACCGCAGTGGGAAGCACCGGGTCTGAA  
TGCAGCATGGCTGCTGAGTGATGTTTTTGCAGATCATAGCGTTCGGATTAAGCCGGTGC  
AGGTTGGCTGCCTGGTGATTGGCTGAATGAAGAAGGCCTGCATCAGGCCATGCGTGCAA  
GCGCACGTGTTCCGGCAGCACAGCTGAGCGGTTATGGTCATCCGTATGGTTTTGCACCGC  
TGCCTGAACACATTGCAGCAGGTCCTGGGTCAGTATGGTATTCGGCTGCAGGCACAGCAG  
GTTGTTCTGACCCAGGGTGCAACCCAGGCACTGGATCTGGTTGTTTCGTACCCTGCTGCGT  
GCCGGTGATCGTGTTCTGGTTGAAAGCCCGTGTTATTGTAATCTGCTGCAGATCCTGCGT  
CTGGCAGGTCTGCGTGTTGTTGGTGTTCGCGTAGCGCAGCCGGTCTGGATACCGATGCA  
CTGGATGATGCAATTCGTGCACATGCACCGCGTGCGCTGTTTATTAACACCGTGCTGCAG  
AATCCGACCGGTGCAAGCCTGAGCAGCATGAATGCATTCGTGTGCTGCAGCTGGCAGA  
ACAGCATCGTCTGCTGGTTGTTGAAGATGATATTTATCGTGAAGTGGCTCCGGCAGGTAG  
CCCGATGCTGGCAGCAATGGATGGTCTGAGCCAGGTTGTTTATATCAATGGTTTTAGCAA  
AACGATTACCCCGAGCCTGCGCGTTGGTTATTTAGCAGCAAGTCCGGATCTGGCAAAGC  
ATTTGCACGTACCAAATGGCAGTTGGTCTGACCAGCAGCGAAGTTACCGAACGTCTGGT  
TTATAGCGTGCTGACCAGCGGTCATTATGGTCCCATGTTGCAGCCCTGGCGGAACGTCT  
GCGTGCCAGCAGGATCGTGTTACCGAAAAAATGGAAGCACATGGTCTGGAAGTTCTGC  
TGCCTCTGAAGGTGGTATGTTTGCATGGGCACGCCTGACCGAAGCCGCACAGGCACGT  
CTGCAGGCAAGCCGTCGTGGTGGTCCGCTGCATGGTAATCGTCTGGCAACCCTGGCGCTG  
GAATATGGTATTTGGCTGGCACCGGGTAGCTATTTGAACCGGATGAAACCGATAGTCCG  
TGGATTCGTTTTAATGTTGCAACCGGTGATGCTCCGCAGCTGTGGCAGTTTTTTGATCGCC  
TGGCGCAGGCACCTCGTGCAGCATAA



# Supplementary Figures

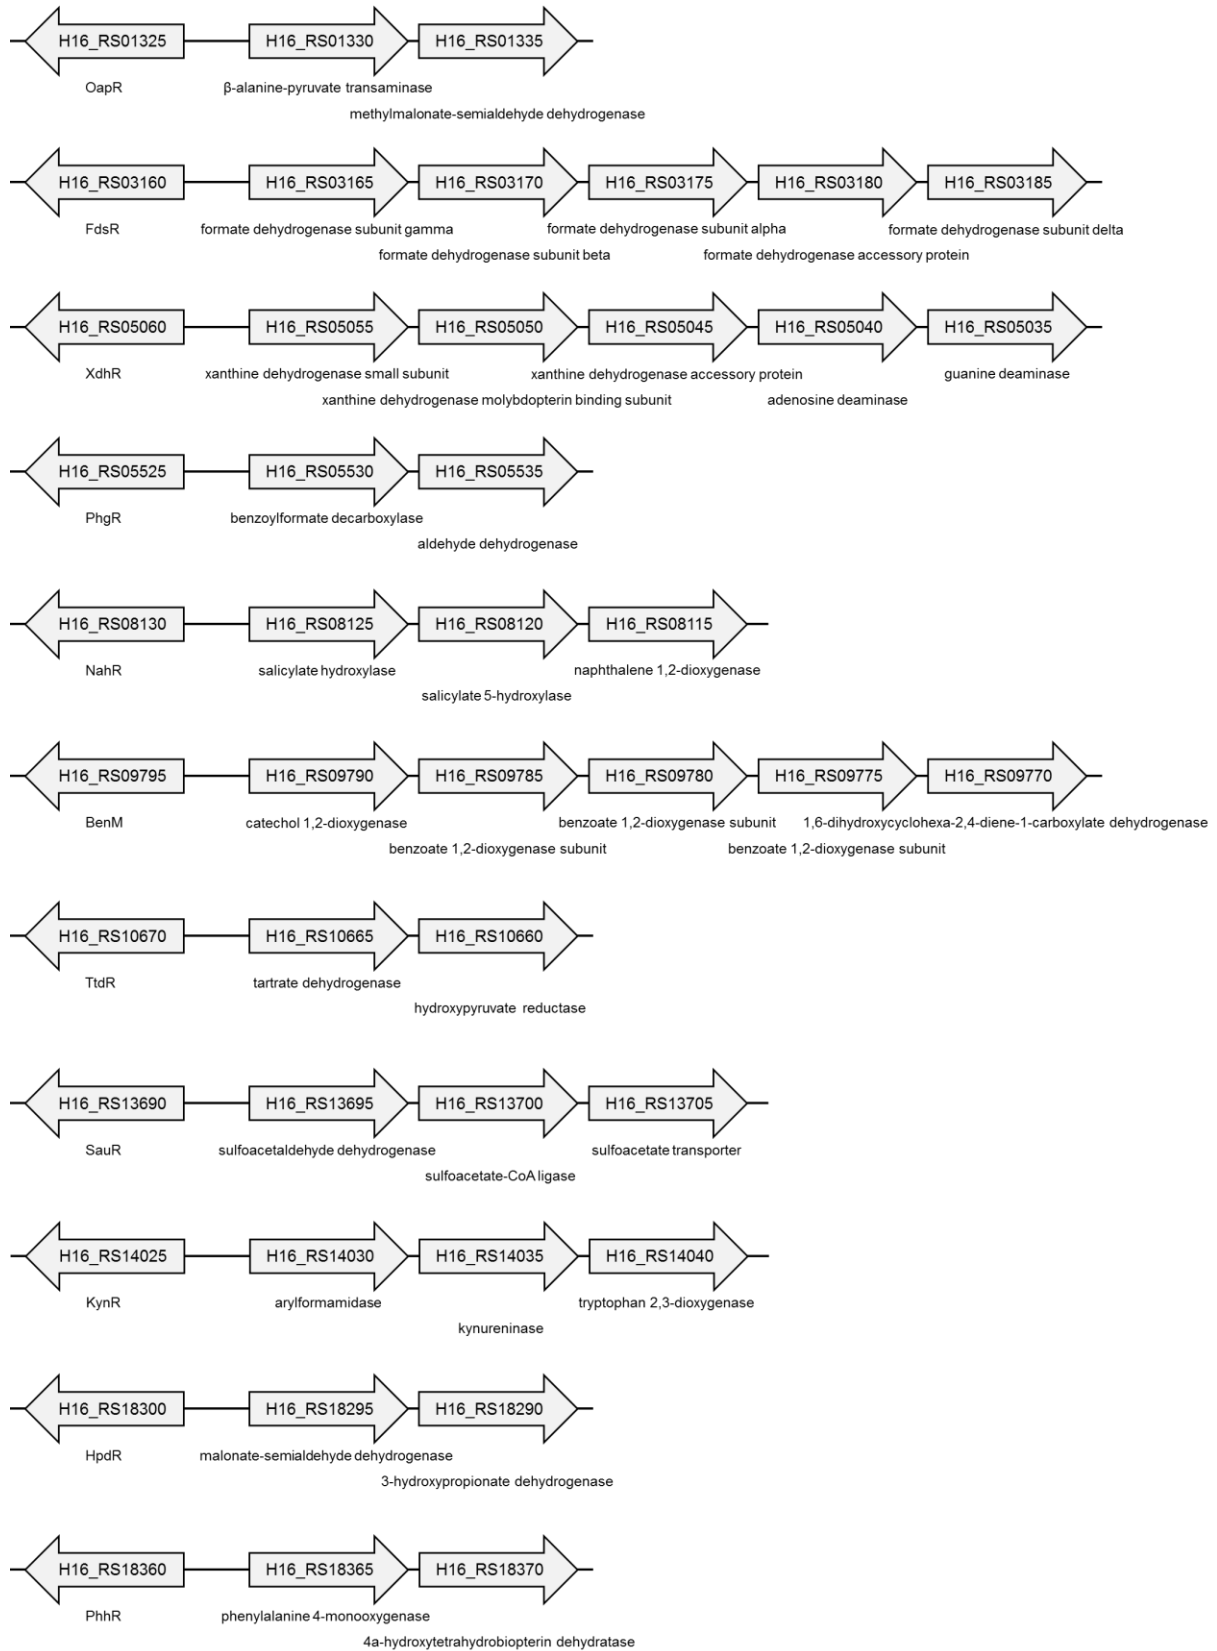

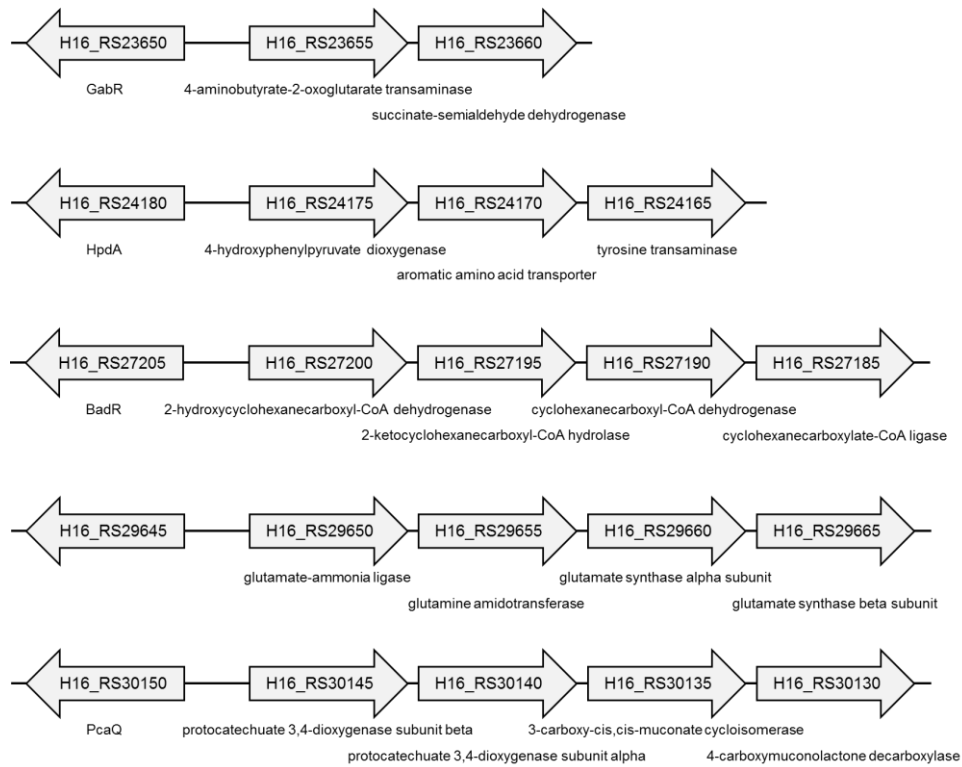

Supplementary Figure 1. Genomic organisation of the 16 identified inducible systems mined from the genome of *C. necator* H16. Locus tags and protein functions are indicated.

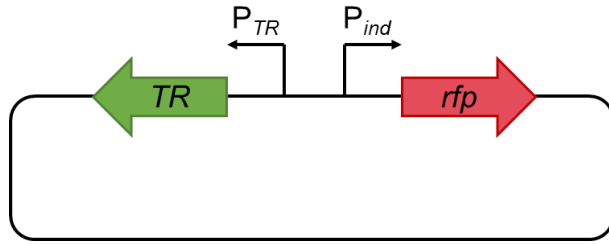

Supplementary Figure 2. Schematic illustration of an inducible system cloned into the reporter vector harbouring a red fluorescent protein (*rfp*) reporter gene. The system is composed of the transcriptional regulator (TR) gene, the TR promoter ( $P_{TR}$ ), and the inducible promoter ( $P_{ind}$ ).

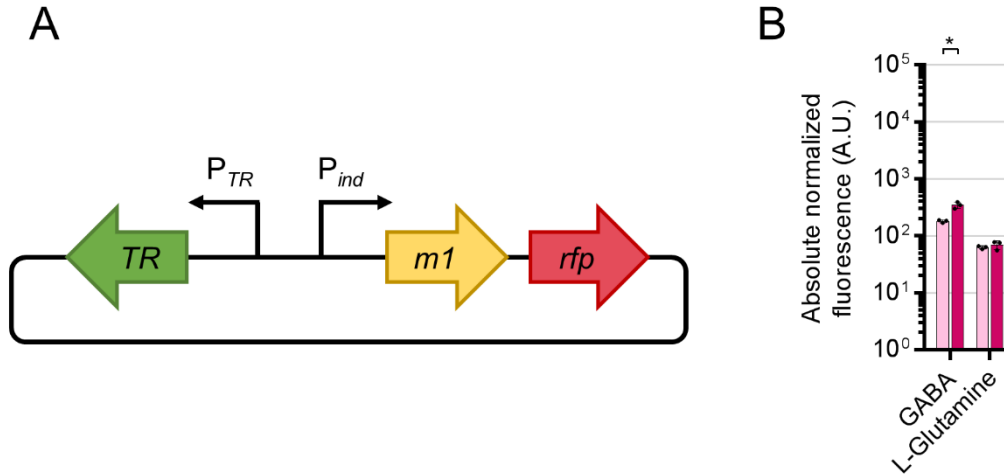

Supplementary Figure 3. (A) Schematic illustration of the modular reporter vector containing a putative inducible system, the first gene in the operon (*m1*), and the intergenic region preceding the second gene of the operon upstream of the *rfp* reporter gene. (B) Single time-point fluorescence measurements of *C. necator* H16 carrying the redesigned putative GABA- and L-glutamine inducible system-reporter constructs (pEH256 and pEH240, respectively). The fluorescence output was determined in the absence of inducer (bright pink) and 6 h after extracellular supplementation with the corresponding effector to a final concentration of 5 mM (dark pink). Data are mean  $\pm$  SD,  $n = 3$ ,  $*p < 0.01$ , unpaired two-tailed *t*-test. Source data are provided as a Source Data file.

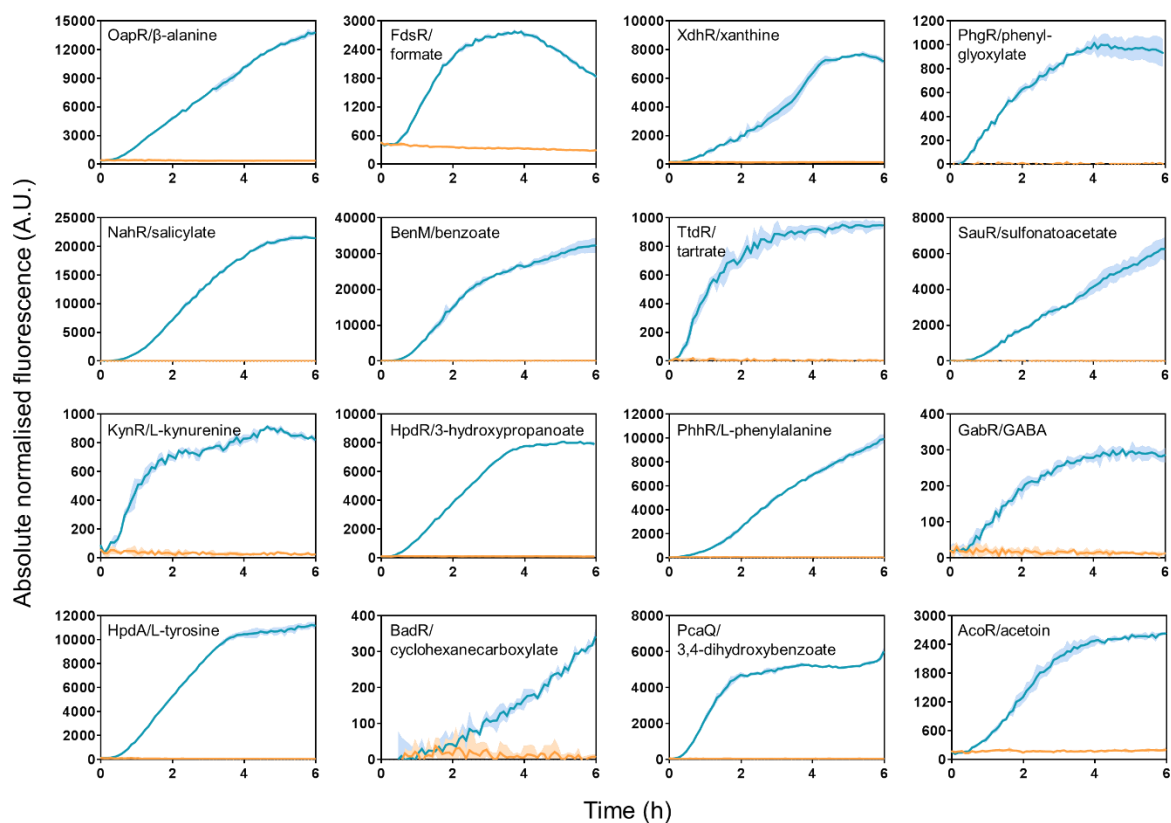

Supplementary Figure 4. Induction kinetics of the identified inducible systems. Absolute normalised fluorescence of *C. necator* carrying the various inducible system-reporter constructs over time. Cells were grown in minimal medium. RFP-fluorescence output was determined in the absence of inducer (orange) and in the presence of the corresponding primary effector added at time 0 h to a final concentration of 5 mM (blue). Data are mean  $\pm$  SD,  $n = 3$ . The standard deviation is shown as a lighter colour ribbon displayed lengthwise of the induction kinetics curve. Source data are provided as a Source Data file.

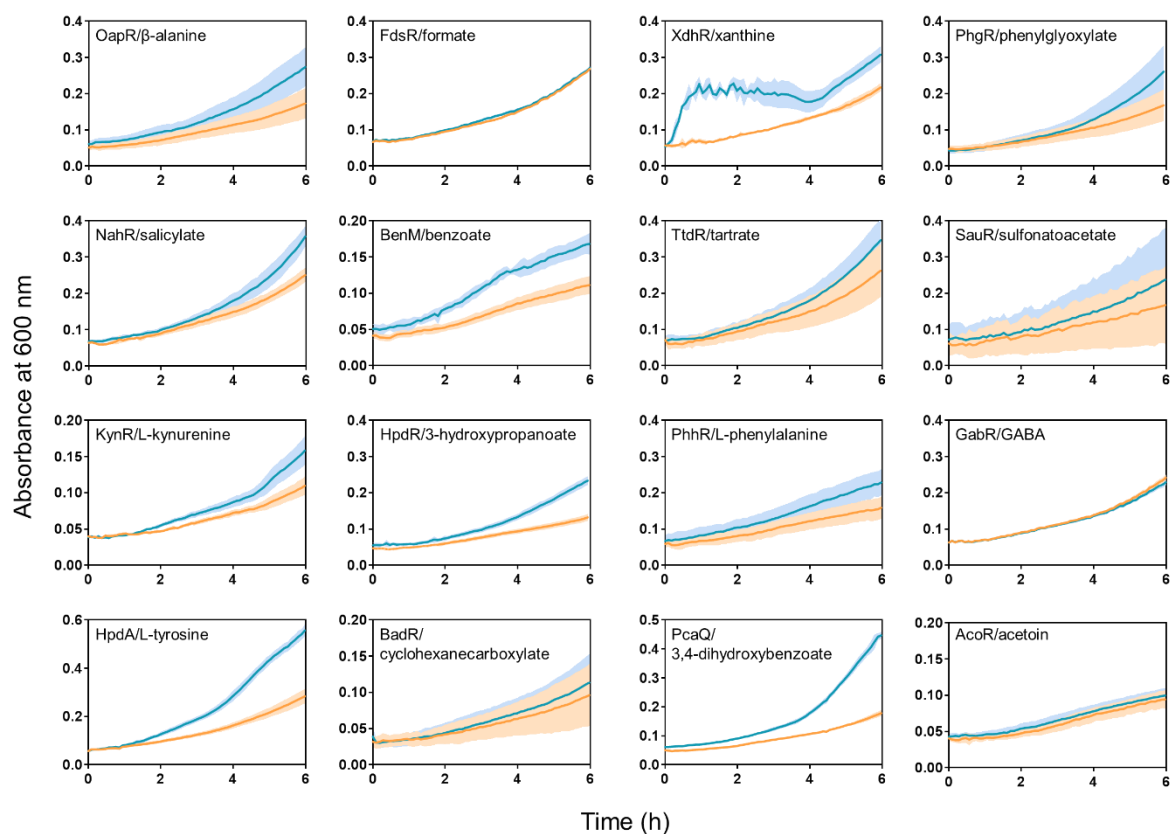

Supplementary Fig. 5. Growth of *C. necator* carrying the various inducible system-reporter constructs over time. Cells were grown in minimal medium. Absorbance was measured in the absence of inducer (orange) and in the presence of the corresponding primary effector added at time 0 h to a final concentration of 5 mM (blue). Data are mean  $\pm$  SD,  $n = 3$ . The standard deviation is shown as a lighter colour ribbon displayed lengthwise of the induction kinetics curve. Source data are provided as a Source Data file.

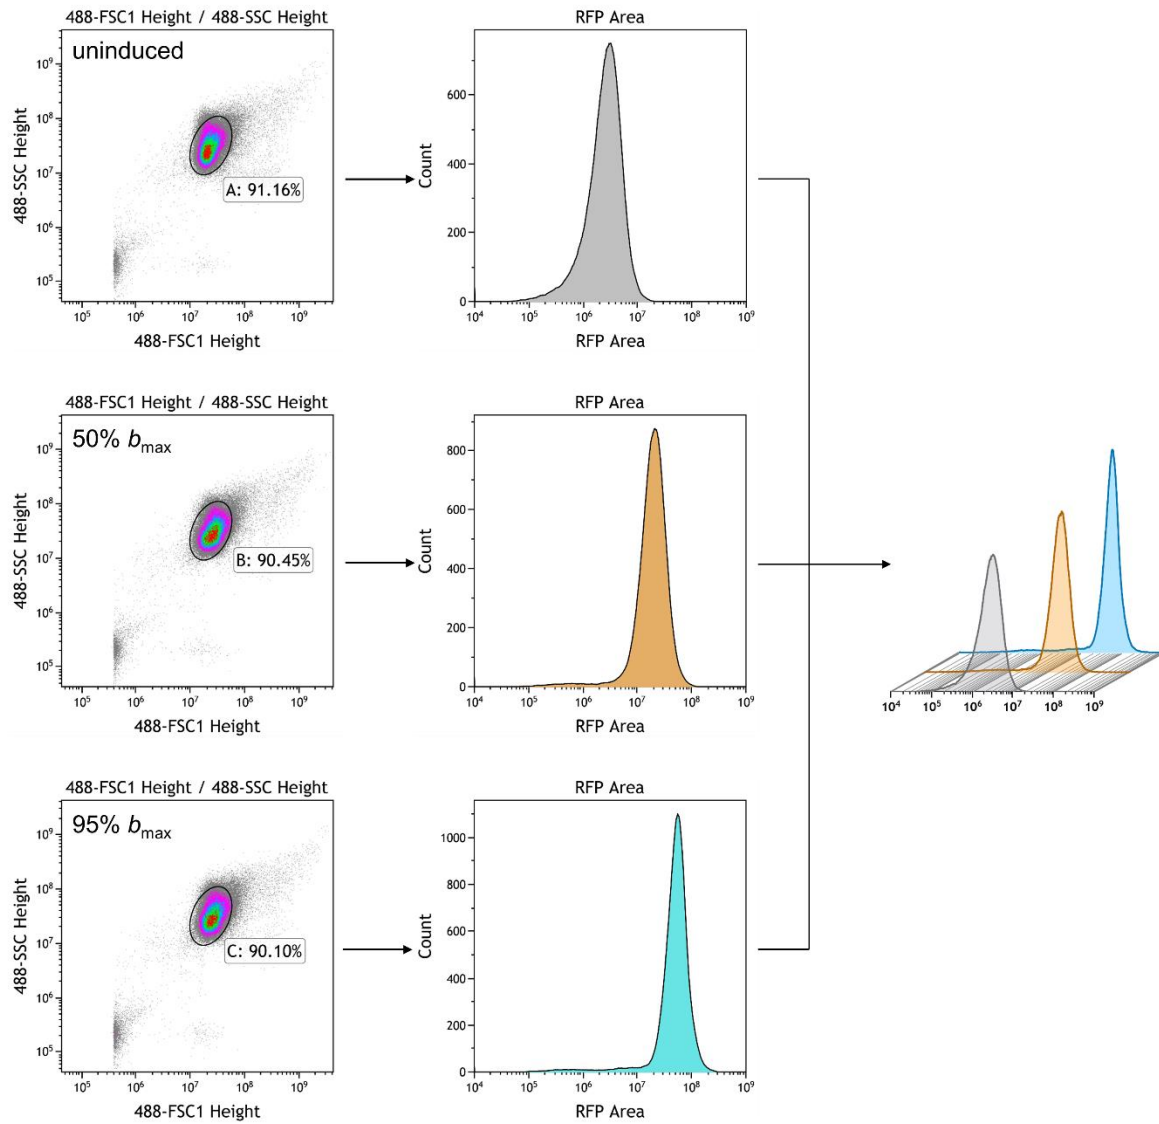

Supplementary Figure 6. Gating strategy used for cell sorting. Gating strategy to sort *C. necator* H16 cells carrying the  $\beta$ -alanine-inducible system-reporter gene construct in the absence of inducer (grey) and in the presence of  $\beta$ -alanine at a concentration corresponding to 50% (orange) and 95% (blue) of the maximum level of reporter output  $b_{\max}$ . The same strategy was applied to all inducible systems presented in Figure 5B.

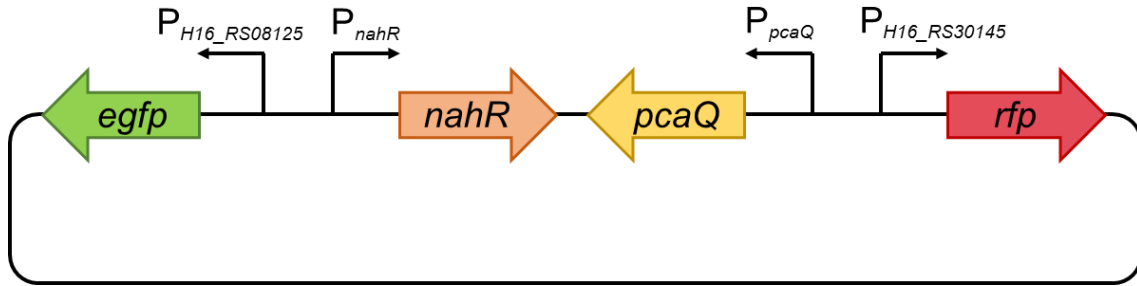

Supplementary Figure 7. Schematic illustration of pEH263. The vector contains the *egfp* reporter gene under control of the salicylate-inducible system NahR/ $P_{H16\_RS08125}$  and *rfp* under control of the 3,4-dihydroxybenzoate-inducible system PcaQ/ $P_{H16\_RS30145}$ .



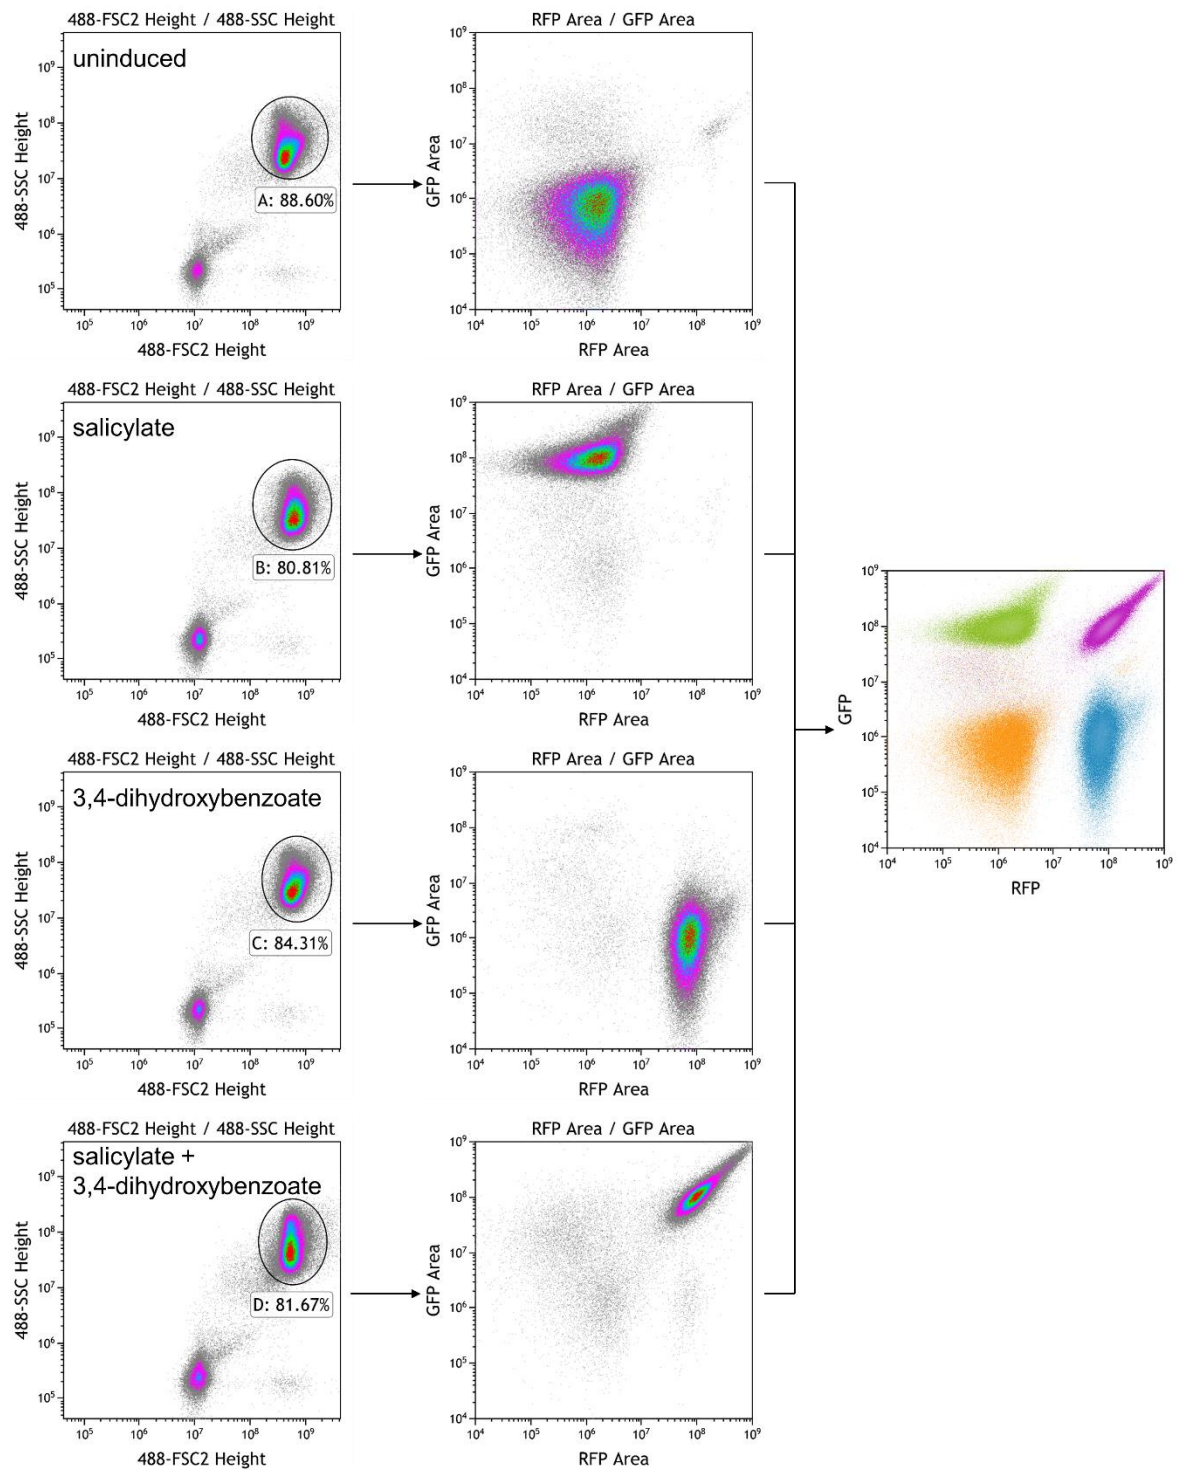

Supplementary Figure 8. Gating strategy used for cell sorting. Gating strategy to sort *C. necator* H16 cells carrying plasmid pEH263 in the absence of inducer (orange), in the presence of salicylate (green), 3,4-dihydroxybenzoate (blue) and both salicylate and 3,4-dihydroxybenzoate (purple) at concentrations corresponding to 50% of the maximum level of reporter output  $b_{\max}$ .

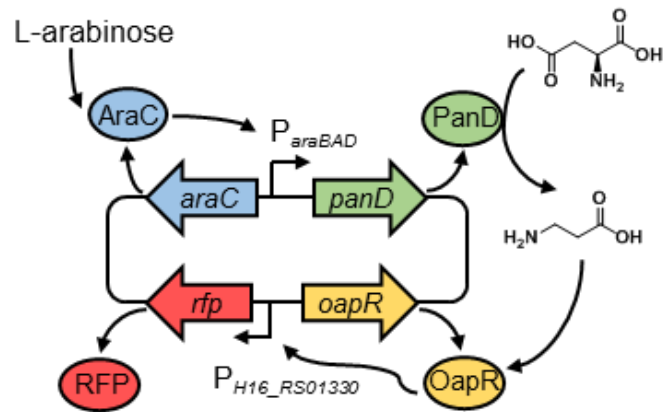

Supplementary Fig. 9. Schematic illustration of the plasmid containing both a  $\beta$ -alanine production and sensing module. Addition of L-arabinose initiates synthesis of L-aspartate 1-decarboxylase PanD which converts L-aspartate into  $\beta$ -alanine. RFP reporter gene expression is subsequently mediated by OapR in the presence of  $\beta$ -alanine.

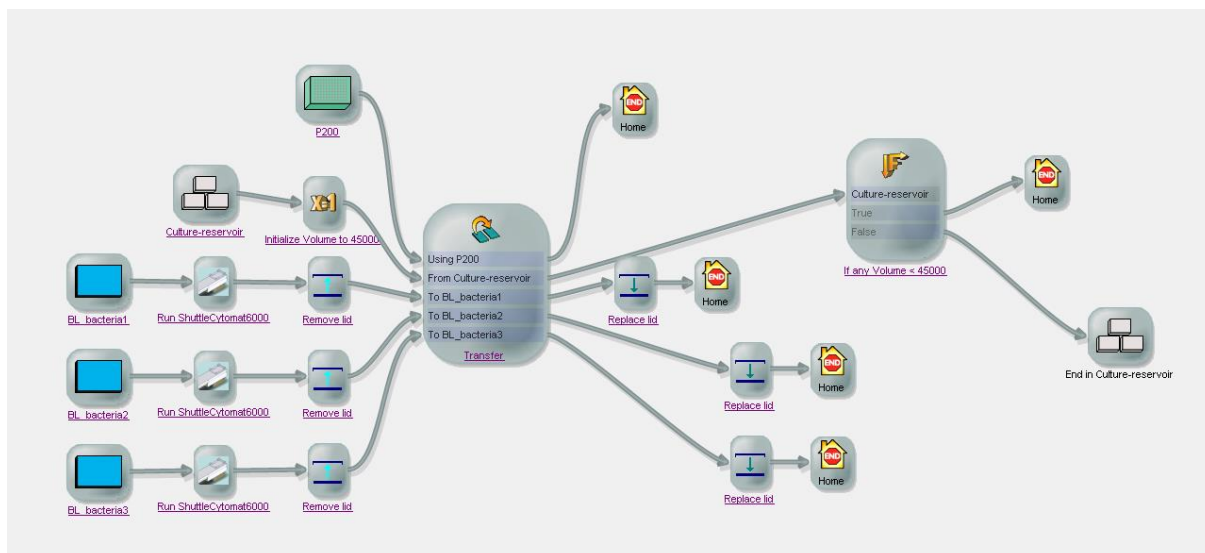

Supplementary Figure 10. Workflow illustrating the automated dispensing of bacterial culture. In total, one strain was dispensed into three black microtiter plates to test 67 compounds for cross-reactivity (four replicates per compound). The workflow was generated using software SEMI EX (Beckman Coulter).

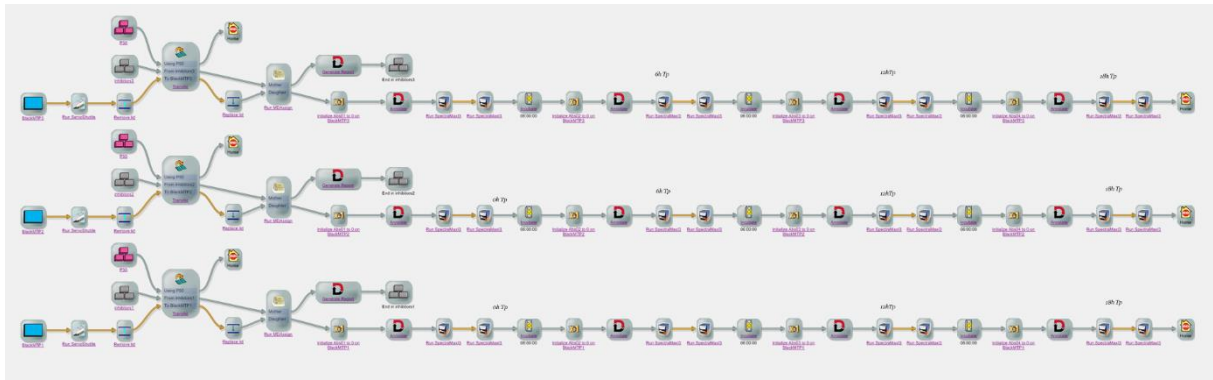

Supplementary Figure 11. Workflow illustrating the automated addition of inducer, fluorescence measurement, and incubation. In total, three black microtiter plates were required to test one strain against 67 compounds (four replicates per compound). The workflow was generated using software SEMI EX (Beckman Coulter).

## Supplementary Tables

Supplementary Table 1. Putative transcription factor-based inducible systems mined from the genome of *C. necator* H16.

| Locus tag regulator | Regulator name | Regulator family | Inducible promoter       |
|---------------------|----------------|------------------|--------------------------|
| H16_RS01325         | OapR           | MocR             | P <sub>H16_RS01330</sub> |
| H16_RS03160         | FdsR           | LysR             | P <sub>H16_RS03165</sub> |
| H16_RS05060         | XdhR           | LysR             | P <sub>H16_RS05055</sub> |
| H16_RS05525         | PhgR           | LysR             | P <sub>H16_RS05530</sub> |
| H16_RS08130         | NahR           | LysR             | P <sub>H16_RS08125</sub> |
| H16_RS09795         | BenM           | LysR             | P <sub>H16_RS09790</sub> |
| H16_RS10670         | TtdR           | LysR             | P <sub>H16_RS10665</sub> |
| H16_RS13690         | SauR           | IclR             | P <sub>H16_RS13695</sub> |
| H16_RS14025         | KynR           | AsnC             | P <sub>H16_RS14030</sub> |
| H16_RS18300         | HpdR           | LysR             | P <sub>H16_RS18295</sub> |
| H16_RS18360         | PhhR           | AsnC             | P <sub>H16_RS18365</sub> |
| H16_RS23650         | GabR           | MocR             | P <sub>H16_RS23655</sub> |
| H16_RS24180         | HpdA           | AsnC             | P <sub>H16_RS24175</sub> |
| H16_RS27205         | BadR           | MarR             | P <sub>H16_RS27200</sub> |
| H16_RS29645         | N/A            | XRE              | P <sub>H16_RS29650</sub> |
| H16_RS30150         | PcaQ           | LysR             | P <sub>H16_RS30145</sub> |

Supplementary Table 2. Previously employed transcription factor-based inducible gene expression systems. The dataset may not be complete.

| Effector            | Inducible system        | Source                                      | Host                                        | Induction factor | Application                            | Reference |
|---------------------|-------------------------|---------------------------------------------|---------------------------------------------|------------------|----------------------------------------|-----------|
| Salicylate          | NagR/P <sub>nagAa</sub> | <i>Ralstonia</i> sp. U2                     | <i>Escherichia coli</i> RFM443              | N/A              | Evaluation of reporter gene expression | 1         |
| Salicylate          | SalR/P <sub>salA</sub>  | <i>Acinetobacter baylyi</i> ADP1            | <i>Acinetobacter baylyi</i> ADP1            | N/A              | Evaluation of cross-regulation         | 2         |
| Salicylate          | NahR/P <sub>sal</sub>   | <i>Pseudomonas putida</i> NAH7              | <i>Escherichia coli</i> Top10               | <120             | Evaluation of reporter gene expression | 3         |
| Salicylate          | NahR/P <sub>sal</sub>   | <i>Pseudomonas putida</i> NAH7              | <i>Escherichia coli</i> SAL1                | ~1.8             | Evaluation of reporter gene expression | 4         |
| Salicylate          | NahR/P <sub>sal</sub>   | <i>Pseudomonas putida</i> KT2440            | <i>Pseudomonas putida</i> KT2440            | N/A              | Evaluation of reporter gene expression | 5         |
| Benzoate            | BenM/P <sub>benA</sub>  | <i>Acinetobacter baylyi</i> ADP1            | <i>Acinetobacter baylyi</i> ADP1            | N/A              | Evaluation of cross-regulation         | 2         |
| Benzoate            | NahR/P <sub>sal</sub>   | <i>Pseudomonas putida</i> NAH7              | <i>Escherichia coli</i> DH10B               | N/A              | Selection of biocatalysts              | 6         |
| Benzoate            | BenR/P <sub>benA</sub>  | Metagneome                                  | <i>Escherichia coli</i> JM109               | ~84              | Screening for amidases                 | 7         |
| 3-hydroxypropanoate | HpdR/P <sub>hpdH</sub>  | <i>Pseudomonas putida</i> KT2440            | <i>Escherichia coli</i> MG1655              | 23.3             | Evaluation of reporter gene expression | 8         |
| 3-hydroxypropanoate | HpdR/P <sub>hpdH</sub>  | <i>Pseudomonas putida</i> KT2440            | <i>Cupriavidus necator</i> H16              | 516.6            | Evaluation of reporter gene expression | 8         |
| 3-hydroxypropanoate | MmsR/P <sub>mmsA</sub>  | <i>Pseudomonas denitrificans</i> ATCC 13867 | <i>Pseudomonas denitrificans</i> ATCC 13867 | <100             | Evaluation of reporter gene expression | 9         |
| 3-hydroxypropanoate | MmsR/P <sub>mmsA</sub>  | <i>Pseudomonas denitrificans</i> ATCC 13867 | <i>Escherichia coli</i>                     | 14               | Evaluation of reporter gene expression | 9         |
| 3-hydroxypropanoate | MmsR/P <sub>mmsA</sub>  | <i>Pseudomonas denitrificans</i> ATCC 13867 | <i>Pseudomonas putida</i>                   | 28               | Evaluation of reporter gene expression | 9         |

|                       |                        |                                  |                                  |      |                                        |    |
|-----------------------|------------------------|----------------------------------|----------------------------------|------|----------------------------------------|----|
| L-phenylalanine       | Tyr/P <sub>tyrP</sub>  | <i>Escherichia coli</i>          | <i>Escherichia coli</i>          | N/A  | Phenotype screening                    | 10 |
| L-phenylalanine       | Tyr/P <sub>mtr</sub>   | <i>Escherichia coli</i> MG1655   | <i>Escherichia coli</i> MG1655   | 4.5  | Phenotype screening                    | 11 |
| L-tyrosine            | TyrR/P <sub>aroF</sub> | <i>Escherichia coli</i>          | <i>Escherichia coli</i>          | N/A  | Phenotype screening                    | 12 |
| 3,4-dihydroxybenzoate | PobR/P <sub>pobA</sub> | <i>Acinetobacter</i> sp. ADP1    | <i>Escherichia coli</i> BL21     | 8-30 | Evaluation of reporter gene expression | 13 |
| 3,4-dihydroxybenzoate | PcaU/P <sub>pcaI</sub> | <i>Acinetobacter baylyi</i> ADP1 | <i>Pseudomonas putida</i> KT2440 | >12  | Evaluation of reporter gene expression | 14 |
| 3,4-dihydroxybenzoate | PcaU/P <sub>pcaI</sub> | <i>Acinetobacter baylyi</i> ADP1 | <i>Escherichia coli</i> BL21     | 14   | Evaluation of reporter gene expression | 15 |

---

Supplementary Table 3. *P. putida* KT2440 BenM and AcoR homologs. The genome of *P. putida* KT2440 was searched for homologs of *C. necator* H16 BenM and AcoR. Amino acid sequence identity (coverage) in %.

| Regulator | <i>C. necator</i> H16 |                             | <i>P. putida</i> KT2440 |                             |
|-----------|-----------------------|-----------------------------|-------------------------|-----------------------------|
|           | Locus tag             | Identity<br>(coverage) in % | Locus tag               | Identity<br>(coverage) in % |
| BenM      | H16_RS09795           | 100 (100)                   | PP_3716                 | 50 (95)                     |
| AcoR      | H16_RS19440           | 100 (100)                   | PP_0557                 | 45 (93)                     |



Supplementary Table 4. Induction of metabolites relative to the induction achieved using the primary effectors in *C. necator* and *E. coli*. Relative induction in *C. necator* was calculated using fluorescence values from the orthogonality screen performed in MM. Relative induction in *E. coli* was calculated using single time-point fluorescence measurements from cultures grown in LB medium. Source data are provided as a Source Data file.

| Compound               | Inducible system              | Relative induction in <i>C. necator</i> (in %) | Relative induction in <i>E. coli</i> (in %) |
|------------------------|-------------------------------|------------------------------------------------|---------------------------------------------|
| Acrylate               | OapR/P <sub>HI6_RS01330</sub> | 68                                             | 2.7*                                        |
| Phenylglyoxylate       | FdsR/P <sub>HI6_RS03165</sub> | 52                                             | 0                                           |
| Phenylglyoxylate       | BenM/P <sub>HI6_RS09790</sub> | 17                                             | 0.19                                        |
| Cyclohexanecarboxylate | BenM/P <sub>HI6_RS09790</sub> | 110                                            | 4.3                                         |
| Cumate                 | BenM/P <sub>HI6_RS09790</sub> | 100                                            | 2.0                                         |
| Acrylate               | HpdR/P <sub>HI6_RS18295</sub> | 113                                            | N/A                                         |
| L-phenylalanine        | HpdA/P <sub>HI6_RS24175</sub> | 77                                             | 0                                           |
| Cumate                 | AcoR/P <sub>HI6_RS19445</sub> | 18                                             | 0                                           |

\*The engineered  $\beta$ -alanine-inducible system was used for evaluation of orthogonality in *E. coli*.

Supplementary Table 5. Induction of metabolites relative to the induction achieved using the primary effectors in *C. necator* and *E. coli*. Relative induction in *C. necator* was calculated using fluorescence values from the orthogonality screen performed in MM. Relative induction in *E. coli* was calculated using single-time point fluorescence measurements from cultures grown in LB medium. Source data are provided as a Source Data file.

| Compound                        | Inducible system              | Relative induction in <i>C. necator</i> (in %) | Relative induction in <i>E. coli</i> (in %) |
|---------------------------------|-------------------------------|------------------------------------------------|---------------------------------------------|
| 3-Aminobutanoate                | OapR/P <sub>H16_RS01330</sub> | 58                                             | 44*                                         |
| D,L-3-Amino-2-hydroxypropanoate | OapR/P <sub>H16_RS01330</sub> | 33                                             | 0.4*                                        |
| Nicotinate                      | FdsR/P <sub>H16_RS03165</sub> | 113                                            | 0                                           |
| Hypoxanthine                    | XdhR/P <sub>H16_RS05055</sub> | 166                                            | N/A                                         |
| 2,6-dihydroxybenzoate           | NahR/P <sub>H16_RS08125</sub> | 8                                              | 0.2                                         |
| N-benzoylglycine                | BenM/P <sub>H16_RS09790</sub> | 21                                             | 0                                           |
| Cyclohexene-1-carboxylate       | BenM/P <sub>H16_RS09790</sub> | 156                                            | 94                                          |
| Catechol                        | BenM/P <sub>H16_RS09790</sub> | 10                                             | 0.2                                         |
| L-tryptophan                    | KynR/P <sub>H16_RS14030</sub> | 66                                             | N/A                                         |
| Cyclohexene-1-carboxylate       | BadR/P <sub>H16_RS27200</sub> | 80                                             | N/A                                         |
| Cyclopentane-1-carboxylate      | BadR/P <sub>H16_RS27200</sub> | 11                                             | N/A                                         |
| 4-Hydroxybenzoate               | PcaQ/P <sub>H16_RS30145</sub> | 212                                            | 0.1                                         |
| L-Lactate                       | AcoR/P <sub>H16_RS19445</sub> | 29                                             | 0                                           |

\*The engineered  $\beta$ -alanine-inducible system was used for evaluation of orthogonality in *E. coli*.

Supplementary Table 6. Chemicals used in this study.

| Chemical                                        | Supplier                                 | Catalogue number |
|-------------------------------------------------|------------------------------------------|------------------|
| 1-Cyclohexene-1-carboxylic acid                 | Sigma-Aldrich                            | 328367           |
| 2,6-Dihydroxybenzoic acid                       | Acros Organics, Thermo Fisher Scientific | 114880250        |
| 3-Aminobutanoic acid                            | Sigma-Aldrich                            | A44207           |
| 3-Hydroxy-2-butanone                            | Alfa Aesar, Thermo Fisher Scientific     | A13752           |
| 3-Hydroxypropionic acid                         | Fluorochem                               | 147100           |
| 3,4-Dihydroxybenzoic acid                       | Sigma-Aldrich                            | 37580            |
| 4-Hydroxybenzoic acid                           | Acros Organics, Thermo Fisher Scientific | 120991000        |
| 4-Hydroxyquinoline-2-carboxylic acid hydrate    | Alfa Aesar, Thermo Fisher Scientific     | A12602           |
| 4-Isopropylbenzoic acid                         | Acros Organics, Thermo Fisher Scientific | 412800050        |
| $\beta$ -Alanine                                | Sigma-Aldrich                            | 146064           |
| $\gamma$ -Aminobutyric acid                     | Sigma-Aldrich                            | A2129            |
| Butyric acid                                    | Alfa Aesar, Thermo Fisher Scientific     | L13189           |
| Caffeine                                        | Alfa Aesar, Thermo Fisher Scientific     | 39214            |
| Catechol                                        | Acros Organics, Thermo Fisher Scientific | 158980050        |
| <i>cis,cis</i> -Muconic acid                    | Acros Organics, Thermo Fisher Scientific | 297760025        |
| Cyclohexanecarboxylic acid                      | Alfa Aesar, Thermo Fisher Scientific     | A14693           |
| Cyclopentanecarboxylic acid                     | Alfa Aesar, Thermo Fisher Scientific     | A12375           |
| D-Mannitol                                      | Sigma-Aldrich                            | M9546            |
| D-Saccharic acid potassium salt                 | Sigma-Aldrich                            | S4140            |
| D,L-2-Phenylglycine                             | Alfa Aesar, Thermo Fisher Scientific     | B21129           |
| D,L-2,3-Diaminopropionic acid monohydrochloride | Alfa Aesar, Thermo Fisher Scientific     | L09485           |
| D,L-Isoserine                                   | Sigma-Aldrich                            | 286338           |
| D,L-Mandelic acid                               | Acros Organics, Thermo Fisher Scientific | 125311000        |
| Dopamine hydrochloride                          | Alfa Aesar, Thermo Fisher Scientific     | A11136           |
| Glycine                                         | Sigma-Aldrich                            | 1042010100       |
| Glyoxylic acid monohydrate                      | Sigma-Aldrich                            | G10601           |
| Hippuric acid                                   | Acros Organics, Thermo Fisher Scientific | 150270050        |
| Hydroquinone                                    | Acros Organics, Thermo Fisher Scientific | 219930500        |
| Hypoxanthine                                    | Sigma-Aldrich                            | H9377            |
| Isethionic acid sodium salt                     | Sigma-Aldrich                            | 220078           |

|                                                 |                                          |           |
|-------------------------------------------------|------------------------------------------|-----------|
| Itaconic acid                                   | Sigma-Aldrich                            | I29204    |
| L- $\alpha$ -Hydroxyglutaric acid disodium salt | Sigma-Aldrich                            | 90790     |
| L-Alanine                                       | Sigma-Aldrich                            | A26802    |
| L-Arabinose                                     | Acros Organics, Thermo Fisher Scientific | 365181000 |
| L-Aspartic acid potassium salt                  | Sigma-Aldrich                            | A6558     |
| L-Glutamine                                     | Sigma-Aldrich                            | G3126     |
| L-Kynurenine                                    | Sigma-Aldrich                            | K8625     |
| L-Malic acid                                    | Sigma-Aldrich                            | M1000     |
| L-Phenylalanine                                 | Sigma-Aldrich                            | P2126     |
| L-Rhamnose monohydrate                          | Sigma-Aldrich                            | R3875     |
| L-Tryptophan                                    | Sigma-Aldrich                            | T0271     |
| L-Tyrosine disodium salt                        | Acros Organics, Thermo Fisher Scientific | 426410250 |
| Levulinic acid                                  | Sigma-Aldrich                            | L2009     |
| Magnesium acrylate                              | Alfa Aesar, Thermo Fisher Scientific     | 42002     |
| Nicotinic acid                                  | Acros Organics, Thermo Fisher Scientific | 128291000 |
| Oxalacetic acid                                 | Acros Organics, Thermo Fisher Scientific | 416600050 |
| Phenol                                          | Acros Organics, Thermo Fisher Scientific | 149340500 |
| Phenyl acetate                                  | Acros Organics, Thermo Fisher Scientific | 148771000 |
| Phenylglyoxylic acid                            | Alfa Aesar, Thermo Fisher Scientific     | L00648    |
| Potassium sodium tartrate                       | Sigma-Aldrich                            | 1551140   |
| Propionic acid                                  | Alfa Aesar, Thermo Fisher Scientific     | L04210    |
| Resorcinol                                      | Acros Organics, Thermo Fisher Scientific | 132290500 |
| Shikimic acid                                   | Acros Organics, Thermo Fisher Scientific | 132700010 |
| Sodium benzoate                                 | Alfa Aesar, Thermo Fisher Scientific     | A15946    |
| Sodium D-lactate                                | Sigma-Aldrich                            | 71716     |
| Sodium formate                                  | Sigma-Aldrich                            | 71539     |
| Sodium fumarate dibasic                         | Sigma-Aldrich                            | F1506     |
| Sodium L-lactate                                | Alfa Aesar, Thermo Fisher Scientific     | L14500    |
| Sodium salicylate                               | Alfa Aesar, Thermo Fisher Scientific     | A17056    |
| Sodium succinate dibasic hexahydrate            | Sigma-Aldrich                            | S2378     |
| Sulfoacetic acid                                | Sigma-Aldrich                            | 242802    |
| Tartronic acid                                  | Sigma-Aldrich                            | 83620     |
| Taurine                                         | Alfa Aesar, Thermo Fisher Scientific     | A12403    |
| Theobromine                                     | Sigma-Aldrich                            | T4500     |
| Tricarballic acid                               | Acros Organics, Thermo Fisher Scientific | 139360050 |

|          |                                          |           |
|----------|------------------------------------------|-----------|
| Uracil   | Sigma-Aldrich                            | U0750     |
| Xanthine | Acros Organics, Thermo Fisher Scientific | 149170050 |

---

Supplementary Table 7. Bacterial strains used in this study.

| Strain                           | Characteristic                                                                                                                                                                                                                                                    | Reference or source                    |
|----------------------------------|-------------------------------------------------------------------------------------------------------------------------------------------------------------------------------------------------------------------------------------------------------------------|----------------------------------------|
| <i>Escherichia coli</i> TOP10    | F <sup>-</sup> <i>mcrA</i> $\Delta$ ( <i>mrr-hsdRMS-mcrBC</i> )<br>$\Phi$ 80 <i>lacZ</i> $\Delta$ M15 $\Delta$ <i>lacX74</i> <i>recA1</i><br><i>araD139</i> $\Delta$ ( <i>araleu</i> )7697 <i>galU</i><br><i>galK</i> <i>rpsL</i> (StrR) <i>endA1</i> <i>nupG</i> | Life Technologies                      |
| <i>Cupriavidus necator</i> H16   | Wild type strain                                                                                                                                                                                                                                                  | DSM 428                                |
| <i>Pseudomonas putida</i> KT2440 | Wild type strain                                                                                                                                                                                                                                                  | Kindly provided by Dr.<br>Stephan Heeb |

Supplementary Table 8. Oligonucleotide primers used in this study. Restriction sites that were used for cloning are underlined.

| Primer name | Primer sequence (5' → 3')                                                                                  |
|-------------|------------------------------------------------------------------------------------------------------------|
| EH015_f     | gcccagctctttcgactgagcctttcgttttatggcgcgccaggccggccgatactggcgaaaatgagacgttg                                 |
| EH051_r     | atggcgagtagcgaagacgttatcaa                                                                                 |
| EH097_r     | tcgtttatgacgtcggcagtgctggggcgaaa                                                                           |
| EH098_f     | gctactcgccatatggctggcttctgcaaggatg                                                                         |
| EH118_r     | ggccggcctg <u>ggcgcgc</u> cataaaacgaaaggctcagtcgaaagactgggcctttcgttttatgacgtcctaataccgaaaacaa<br>gccgacg   |
| EH119_f     | gctactcgccatatgtgtctccggctatgtctcttcg                                                                      |
| EH133_r     | cgaaaggctcagtcgaaagactgggcctttcgttttatgacgtcttatgcgtcgggtgggctc                                            |
| EH134_f     | gcgctgctggcctgtgctgctgccggcagcctgaagacctcatcagc                                                            |
| EH135_r     | gccggcaggcagcacggcgcacgcgcgcctgtgtgcgatacggttgtcc                                                          |
| EH136_f     | ttgataacgtcttcgctactcgccatatgctgtctcctgttgcgt                                                              |
| EH182_r     | ggccggcctg <u>ggcgcgc</u> cataaaacgaaaggctcagtcgaaagactgggcctttcgttttatgacgtcttactcccaaactca<br>ctgaacctgg |
| EH183_f     | gctactcgccatatgtgtctcctggccagatcga                                                                         |
| EH210_r     | tcgtttatgacgtcgggtgccgtctattattgatttatgaatgt                                                               |
| EH211_r     | tcgtttatgacgtcggcggcaggcagcacggc                                                                           |
| EH212_f     | gctactcgccatatgctgtctcctgttgcgttgcgt                                                                       |
| EH213_r     | tcgtttatgacgtctccatctttaattcaggttaacaatggt                                                                 |
| EH217_f     | tcgtttatgacgtccaggcactcgggcaggcgtga                                                                        |
| EH258_r     | cagtcgaaagactgggcctttcgttttatgacgtcctagcgcgcctcagcgtaat                                                    |
| EH259_f     | ttgataacgtcttcgctactcgccatatgctgtcctgtgaggcattgcgc                                                         |
| EH262_r     | tcgtttatgacgtcctaggcgcctccgccgc                                                                            |
| EH263_f     | gctactcgccatatgggtgcgcggcgcctttg                                                                           |
| EH264_r     | tcgtttatgacgtctcagcgcaggtgcgacag                                                                           |
| EH265_f     | gctactcgccatatgtgcgcgtctccttgaatgc                                                                         |
| EH272_r     | cagtcgaaagactgggcctttcgttttatgacgtcatgtagaaaatagcttattgaaggccgct                                           |
| EH273_r     | tcgtttatgacgtctcgaatttccttcgactaatcatcaattcttcgattttatgc                                                   |
| EH274_r     | tcgtttatgacgtcacacaaatcccgcattcttcagtt                                                                     |
| EH275_r     | cagtcgaaagactgggcctttcgttttatgacgtctcagccggcctctgcctc                                                      |
| EH276_f     | ttgataacgtcttcgctactcgccatatgcttctctcttggatggcgga                                                          |
| EH277_r     | tcgtttatgacgtctcagcccacgtccgatgc                                                                           |

EH278\_f gctactcgccatatgcggtggaggctccagtgcg  
EH279\_r cagtcgaaagactgggcctttcgttttatgacgtctcaacgctgcggggcgcg  
EH280\_f ttgataacgtcttcgctactcgccatatggcggttaaggactgtcggcaccggc  
EH281\_r tcgtttatgacgtcctattcgagaacgtcttcacatctc  
EH282\_f gctactcgccatatgttcgactccgcggtttgga  
EH283\_r tcgtttatgacgtctcaggcctccagcggcac  
EH284\_f gctactcgccatatgttctcactaaagggcgggaaataatattgt  
EH285\_r tcgtttatgacgtctcagtcacctgggctgcc  
EH286\_f gctactcgccatatgttctcctttcaggattccggtgct  
EH287\_r tcgtttatgacgtctcactccccttgcgcggatagatgggatg  
EH288\_f gctactcgccatatgcccggctggcggccgaag  
EH289\_r tcgtttatgacgtctcactgagcgggaagcagg  
EH290\_f gctactcgccatatggcagtctcctcgtcgttg  
EH297\_r tcgtttatgacgtcggcgatggcggccctccg  
EH298\_r tcgtttatgacgtcgggatcaaattaagattccgggacg  
EH299\_r tcgtttatgacgtctttgatttcctcacatcagagattcacg  
EH300\_r tcgtttatgacgtcagtccttttcacagtgttggcgtcttg  
EH301\_r tcgtttatgacgtcgcctaaagttatcgatttaacagtaatcttaattaca  
EH344\_f actagtactgtttaaaccgctcacaattccaca  
EH345\_r tcgtttatggcgcgccagggccgccaattagaaggccgccagagagg  
EH360\_r cagtcgaaagactgggcctttcgttttatgacgtctcactccccttgcgcggat  
EH361\_f ttgataacgtcttcgctactcgccatatgtgattccttctcaaaagaattccaggt  
EH397\_r cagtcgaaagactgggcctttcgttttatgacgtcttctctcggcacgggtc  
EH398\_f ttgataacgtcttcgctactcgccatatgtccccttattcggccag  
EH415\_r ggcgctcctcggccggcctggcgcgccataaacgaaaggctcagtcgaaagactgggcctttcgttttattactgtaca  
gctcgtccatgc  
EH420\_f aaaagtgccacctgggatgacctgcaggaaaaggccatccgctcaggatggccttctggatccttaagcaccggtg  
EH421\_f ccggagacacatatggtgagcaaggcgcgaggagctgt  
EH422\_r cttgctcacatatggtctcggctatgtct  
EH423\_f aaataataaaaaagccggattaataatctggcctttatattctctaatccgaaacaagccgacg  
EH424\_r attaatccggcctttttatttttactgagcgggaagcaggc  
EH425\_f gctactcgccatcgggcagtctcctcgtcg  
EH426\_r ggagactgcccgatggcgagtagcgaagacg  
EH435\_r gccggcctggcgcgccataaacgaaaggctcagtcgaaagactgggcctttcgttttatgacgtcattggcaccatcgga  
ttgc  
EH436\_f ctactcgccatatgtccccttattcggccag



EH441\_r ttctggcgctcctgcggccggcctggcgcgccataaaacga  
EH442\_r acaacggttccctctagaataatTTTggaattcaaaagatctTTTaaagaaggagatataacatgattcgacgatgctgc  
EH443\_f ccacctgggatgacctgcaggaaaaggccatccgtcaggatggccttctcaagcaacctgtaccggaa  
EH444\_r acaacggttccctctagaataatTTTggaattcaaaagatctTTTaaagaaggagatataacatgcaacgatcatgctcc  
EH445\_f ccacctgggatgacctgcaggaaaaggccatccgtcaggatggccttctcagaacttctgattccttgatgcc  
EH446\_r acaacggttccctctagaataatTTTggaattcaaaagatctTTTaaagaaggagatataacatgctgcgccatcctc  
EH447\_f ccacctgggatgacctgcaggaaaaggccatccgtcaggatggccttctcctaaatgcttctcgacgtcaaaagc  
EH448\_r acaacggttccctctagaataatTTTggaattcaaaagatctTTTaaagaaggagatataacatgcacgccataatgctca  
EH449\_f ccacctgggatgacctgcaggaaaaggccatccgtcaggatggccttctcaggcgacctgtatcgg  
EH450\_r acaacggttccctctagaataatTTTggaattcaaaagatctTTTaaagaaggagatataacatgggggagcattcgtttgatg  
EH451\_f ccacctgggatgacctgcaggaaaaggccatccgtcaggatggccttctcaatgggggatggcttc  
EH452\_r acaacggttccctctagaataatTTTggaattcaaaagatctTTTaaagaaggagatataacatgttgcacgatgatgaacg  
EH453\_f ccacctgggatgacctgcaggaaaaggccatccgtcaggatggccttcttatagaattgtaccagctgggtctgt  
EHseq02 gtctgggtaccttcgtacgga  
6\_f  
N30\_f tcgtttatgacgtcttacatgctgccgggtgctac  
N31\_r gctactgccatagctcctcctagggggaatcgg  
N36\_f tttatgacgtcttacgttgcgccttattcctcgg  
N37\_f tttatgacgtcttaaccgccacgaagtaacgc  
N38\_r atatatcatatgggtctccatagttgtggtggg  
N39\_r atatgtacaattccctTTTaatcatccggctcgtataatgtgtggagactgaattcactagtttaactttaagaaggagatatata  
tgctgacctgaacctgac  
N40\_r atatgtacaattccctTTTaatcatccggctcgtataatgtgtggagactgaattcactagtttaactttaagaaggagatatata  
tgctgacctgaatctgacct

---

Supplementary Table 9. Plasmids used and generated in this study.

| Plasmid    | Characteristic                                                                                                                               | Reference or source |
|------------|----------------------------------------------------------------------------------------------------------------------------------------------|---------------------|
| p17ACKHEP  | Kan <sup>r</sup> ; P <sub>H16_RS01325</sub> - <i>oapR</i> CoEC, P <sub>H16_RS01330</sub>                                                     | Life Technologies   |
| pEH006     | Cm <sup>r</sup> ; P <sub>araC</sub> - <i>araC</i> -T <sub>rmb1</sub> , P <sub>araBAD</sub> -T7sl- <i>rfp</i> -T <sub>dbl</sub>               | 8                   |
| pEH006E    | Cm <sup>r</sup> ; T <sub>rmb1</sub> - <i>rfp</i> -T <sub>dbl</sub>                                                                           | 8                   |
| pEH010     | Cm <sup>r</sup> ; P <sub>H16_RS18300</sub> - <i>hpdR</i> -T <sub>rmb1</sub> , P <sub>H16_RS18295</sub> - <i>rfp</i> -T <sub>dbl</sub>        | 8                   |
| pEH176     | Cm <sup>r</sup> ; P <sub>araC</sub> - <i>araC</i> -T <sub>rmb1</sub> , P <sub>araBAD</sub> - <i>rfp</i> -T <sub>dbl</sub>                    | 16                  |
| pJOE7801.1 | Kan <sup>r</sup> ; P <sub>tetR</sub> - <i>tetR</i> ; P <sub>tetA</sub> - <i>egfp</i> -T <sub>rmb</sub>                                       | 17                  |
| pME6000    | Tet <sup>r</sup> ; P <sub>lac</sub> - <i>lacZ</i> α                                                                                          | 18                  |
| pEH035     | Cm <sup>r</sup> ; P <sub>H16_RS18295</sub> - <i>rfp</i> -T <sub>dbl</sub>                                                                    | This study          |
| pEH042     | Cm <sup>r</sup> ; P <sub>H16_RS08130</sub> - <i>nahR</i> -T <sub>rmb1</sub> , P <sub>H16_RS08125</sub> - <i>rfp</i> -T <sub>dbl</sub>        | This study          |
| pEH052     | Cm <sup>r</sup> ; P <sub>H16_RS19440</sub> - <i>acoR</i> -T <sub>rmb1</sub> , P <sub>H16_RS19445</sub> - <i>rfp</i> -T <sub>dbl</sub>        | This study          |
| pEH083     | Cm <sup>r</sup> ; P <sub>H16_RS10670</sub> - <i>tttR</i> -T <sub>rmb1</sub> , P <sub>H16_RS10665</sub> - <i>rfp</i> -T <sub>dbl</sub>        | This study          |
| pEH095     | Cm <sup>r</sup> ; P <sub>H16_RS08125</sub> - <i>rfp</i> -T <sub>dbl</sub>                                                                    | This study          |
| pEH096     | Cm <sup>r</sup> ; P <sub>H16_RS19445</sub> - <i>rfp</i> -T <sub>dbl</sub>                                                                    | This study          |
| pEH097     | Cm <sup>r</sup> ; P <sub>H16_RS10665</sub> - <i>rfp</i> -T <sub>dbl</sub>                                                                    | This study          |
| pEH101     | Cm <sup>r</sup> ; P <sub>H16_RS01330</sub> - <i>rfp</i> -T <sub>dbl</sub>                                                                    | This study          |
| pEH134     | Cm <sup>r</sup> ; P <sub>H16_RS03160</sub> - <i>fdsR</i> -T <sub>rmb1</sub> , P <sub>H16_RS03165</sub> - <i>rfp</i> -T <sub>dbl</sub>        | This study          |
| pEH136     | Cm <sup>r</sup> ; P <sub>H16_RS14025</sub> - <i>kynR</i> -T <sub>rmb1</sub> , P <sub>H16_RS14030</sub> - <i>rfp</i> -T <sub>dbl</sub>        | This study          |
| pEH137     | Cm <sup>r</sup> ; P <sub>H16_RS18360</sub> - <i>phhR</i> -T <sub>rmb1</sub> , P <sub>H16_RS18365</sub> - <i>rfp</i> -T <sub>dbl</sub>        | This study          |
| pEH147     | Cm <sup>r</sup> ; P <sub>H16_RS01325</sub> - <i>oapR</i> -T <sub>rmb1</sub> , P <sub>H16_RS01330</sub> - <i>rfp</i> -T <sub>dbl</sub>        | This study          |
| pEH148     | Cm <sup>r</sup> ; P <sub>H16_RS09795</sub> - <i>benM</i> -T <sub>rmb1</sub> , P <sub>H16_RS09790</sub> - <i>rfp</i> -T <sub>dbl</sub>        | This study          |
| pEH149     | Cm <sup>r</sup> ; P <sub>H16_RS09790</sub> - <i>rfp</i> -T <sub>dbl</sub>                                                                    | This study          |
| pEH151     | Cm <sup>r</sup> ; P <sub>H16_RS03165</sub> - <i>rfp</i> -T <sub>dbl</sub>                                                                    | This study          |
| pEH152     | Cm <sup>r</sup> ; P <sub>H16_RS14030</sub> - <i>rfp</i> -T <sub>dbl</sub>                                                                    | This study          |
| pEH153     | Cm <sup>r</sup> ; P <sub>H16_RS18365</sub> - <i>rfp</i> -T <sub>dbl</sub>                                                                    | This study          |
| pEH154     | Cm <sup>r</sup> ; P <sub>H16_RS05060</sub> - <i>xdhR</i> -T <sub>rmb1</sub> , P <sub>H16_RS05055</sub> - <i>rfp</i> -T <sub>dbl</sub>        | This study          |
| pEH155     | Cm <sup>r</sup> ; P <sub>H16_RS05525</sub> - <i>phgR</i> -T <sub>rmb1</sub> , P <sub>H16_RS05530</sub> - <i>rfp</i> -T <sub>dbl</sub>        | This study          |
| pEH156     | Cm <sup>r</sup> ; P <sub>H16_RS23650</sub> - <i>gabR</i> -T <sub>rmb1</sub> , P <sub>H16_RS23655</sub> - <i>rfp</i> -T <sub>dbl</sub>        | This study          |
| pEH157     | Cm <sup>r</sup> ; P <sub>H16_RS13690</sub> - <i>sauR</i> -T <sub>rmb1</sub> , P <sub>H16_RS13695</sub> - <i>rfp</i> -T <sub>dbl</sub>        | This study          |
| pEH158     | Cm <sup>r</sup> ; P <sub>H16_RS24180</sub> - <i>hpdA</i> -T <sub>rmb1</sub> , P <sub>H16_RS24175</sub> - <i>rfp</i> -T <sub>dbl</sub>        | This study          |
| pEH159     | Cm <sup>r</sup> ; P <sub>H16_RS27205</sub> - <i>badR</i> -T <sub>rmb1</sub> , P <sub>H16_RS27200</sub> - <i>rfp</i> -T <sub>dbl</sub>        | This study          |
| pEH160     | Cm <sup>r</sup> ; P <sub>H16_RS29645</sub> - <i>H16_RS29645</i> -T <sub>rmb1</sub> , P <sub>H16_RS29650</sub> - <i>rfp</i> -T <sub>dbl</sub> | This study          |

|        |                                                                                 |            |
|--------|---------------------------------------------------------------------------------|------------|
| pEH161 | $Cm^r$ ; $P_{H16\_RS30150-pcaQ-T_{rrnb1}}$ , $P_{H16\_RS30145-rfp-T_{dbl}}$     | This study |
| pEH167 | $Cm^r$ ; $P_{H16\_RS05055-rfp-T_{dbl}}$                                         | This study |
| pEH168 | $Cm^r$ ; $P_{H16\_RS13695-rfp-T_{dbl}}$                                         | This study |
| pEH169 | $Cm^r$ ; $P_{H16\_RS24175-rfp-T_{dbl}}$                                         | This study |
| pEH170 | $Cm^r$ ; $P_{H16\_RS27200-rfp-T_{dbl}}$                                         | This study |
| pEH171 | $Cm^r$ ; $P_{H16\_RS30145-rfp-T_{dbl}}$                                         | This study |
| pEH173 | $Cm^r$ ; $P_{H16\_RS01325-oapRcoEc-T_{rrnb1}}$ , $P_{H16\_RS01330-rfp-T_{dbl}}$ | This study |
| pEH194 | $Tet^r$ ; $P_{H16\_RS08130-nahR-T_{rrnb1}}$ , $P_{H16\_RS08125-rfp-T_{dbl}}$    | This study |
| pEH195 | $Tet^r$ ; $P_{H16\_RS08125-rfp-T_{dbl}}$                                        | This study |
| pEH196 | $Tet^r$ ; $P_{H16\_RS01330-rfp-T_{dbl}}$                                        | This study |
| pEH197 | $Tet^r$ ; $P_{H16\_RS18300-hpdR-T_{rrnb1}}$ , $P_{H16\_RS18295-rfp-T_{dbl}}$    | This study |
| pEH198 | $Tet^r$ ; $P_{H16\_RS18295-rfp-T_{dbl}}$                                        | This study |
| pEH199 | $Tet^r$ ; $P_{H16\_RS10670-ttdR-T_{rrnb1}}$ , $P_{H16\_RS10665-rfp-T_{dbl}}$    | This study |
| pEH200 | $Tet^r$ ; $P_{H16\_RS10665-rfp-T_{dbl}}$                                        | This study |
| pEH201 | $Tet^r$ ; $P_{H16\_RS19445-rfp-T_{dbl}}$                                        | This study |
| pEH202 | $Tet^r$ ; $P_{H16\_RS03160-fdsR-T_{rrnb1}}$ , $P_{H16\_RS03165-rfp-T_{dbl}}$    | This study |
| pEH203 | $Tet^r$ ; $P_{H16\_RS03165-rfp-T_{dbl}}$                                        | This study |
| pEH204 | $Tet^r$ ; $P_{H16\_RS05055-rfp-T_{dbl}}$                                        | This study |
| pEH205 | $Tet^r$ ; $P_{H16\_RS09795-benM-T_{rrnb1}}$ , $P_{H16\_RS09790-rfp-T_{dbl}}$    | This study |
| pEH206 | $Tet^r$ ; $P_{H16\_RS09790-rfp-T_{dbl}}$                                        | This study |
| pEH207 | $Tet^r$ ; $P_{H16\_RS13695-rfp-T_{dbl}}$                                        | This study |
| pEH208 | $Tet^r$ ; $P_{H16\_RS14025-kynR-T_{rrnb1}}$ , $P_{H16\_RS14030-rfp-T_{dbl}}$    | This study |
| pEH209 | $Tet^r$ ; $P_{H16\_RS14030-rfp-T_{dbl}}$                                        | This study |
| pEH210 | $Tet^r$ ; $P_{H16\_RS18360-phhR-T_{rrnb1}}$ , $P_{H16\_RS18365-rfp-T_{dbl}}$    | This study |
| pEH211 | $Tet^r$ ; $P_{H16\_RS18365-rfp-T_{dbl}}$                                        | This study |
| pEH212 | $Tet^r$ ; $P_{H16\_RS24180-hpdA-T_{rrnb1}}$ , $P_{H16\_RS24175-rfp-T_{dbl}}$    | This study |
| pEH213 | $Tet^r$ ; $P_{H16\_RS24175-rfp-T_{dbl}}$                                        | This study |
| pEH214 | $Tet^r$ ; $P_{H16\_RS27205-badR-T_{rrnb1}}$ , $P_{H16\_RS27200-rfp-T_{dbl}}$    | This study |
| pEH215 | $Tet^r$ ; $P_{H16\_RS27200-rfp-T_{dbl}}$                                        | This study |
| pEH216 | $Tet^r$ ; $P_{H16\_RS30150-pcaQ-T_{rrnb1}}$ , $P_{H16\_RS30145-rfp-T_{dbl}}$    | This study |
| pEH217 | $Tet^r$ ; $P_{H16\_RS30145-rfp-T_{dbl}}$                                        | This study |
| pEH218 | $Tet^r$ ; $P_{H16\_RS05525-phgR-T_{rrnb1}}$ , $P_{H16\_RS05530-rfp-T_{dbl}}$    | This study |
| pEH220 | $Tet^r$ ; $P_{araC-araC-T_{rrnb1}}$ , $P_{araBAD-rfp-T_{dbl}}$                  | This study |
| pEH221 | $Tet^r$ ; $P_{H16\_RS01325-oapR-T_{rrnb1}}$ , $P_{H16\_RS01330-rfp-T_{dbl}}$    | This study |
| pEH222 | $Tet^r$ ; $P_{H16\_RS19440-acoR-T_{rrnb1}}$ , $P_{H16\_RS19445-rfp-T_{dbl}}$    | This study |
| pEH223 | $Tet^r$ ; $P_{H16\_RS05060-xdhR-T_{rrnb1}}$ , $P_{H16\_RS05055-rfp-T_{dbl}}$    | This study |

|        |                                                                                                                                                                                                                                           |            |
|--------|-------------------------------------------------------------------------------------------------------------------------------------------------------------------------------------------------------------------------------------------|------------|
| pEH224 | Tet <sup>r</sup> ; P <sub>H16_RS13690-sauR</sub> -T <sub>rmb1</sub> , P <sub>H16_RS13695-rfp</sub> -T <sub>dbl</sub>                                                                                                                      | This study |
| pEH225 | Cm <sup>r</sup> ; P <sub>13-oapR</sub> -T <sub>rmb1</sub> , P <sub>H16_RS01330-rfp</sub> -T <sub>dbl</sub>                                                                                                                                | This study |
| pEH226 | Cm <sup>r</sup> ; P <sub>13-oapRcoEc</sub> -T <sub>rmb1</sub> , P <sub>H16_RS01330-rfp</sub> -T <sub>dbl</sub>                                                                                                                            | This study |
| pEH229 | Cm <sup>r</sup> ; P <sub>H16_RS05530-rfp</sub> -T <sub>dbl</sub>                                                                                                                                                                          | This study |
| pEH234 | Tet <sup>r</sup> ; P <sub>13-oapR</sub> -T <sub>rmb1</sub> , P <sub>H16_RS01330-rfp</sub> -T <sub>dbl</sub>                                                                                                                               | This study |
| pEH235 | Tet <sup>r</sup> ; P <sub>13-oapRcoEc</sub> -T <sub>rmb1</sub> , P <sub>H16_RS01330-rfp</sub> -T <sub>dbl</sub>                                                                                                                           | This study |
| pEH240 | Cm <sup>r</sup> ; P <sub>H16_RS29645-H16_RS29645</sub> -T <sub>rmb1</sub> , P <sub>H16_RS29650-H16_RS29650-H16_RS29655-15:rfp</sub> -T <sub>dbl</sub>                                                                                     | This study |
| pEH256 | Cm <sup>r</sup> ; P <sub>H16_RS23650-gabR</sub> -T <sub>rmb1</sub> , P <sub>H16_RS23655-H16_RS23655-H16_RS23660-9::rfp</sub> -T <sub>dbl</sub>                                                                                            | This study |
| pEH257 | Tet <sup>r</sup> ; P <sub>H16_RS05530-rfp</sub> -T <sub>dbl</sub>                                                                                                                                                                         | This study |
| pEH263 | Tet <sup>r</sup> ; P <sub>H16_RS08130-nahR</sub> -T <sub>luxICDABEG</sub> , P <sub>H16_RS08125-egfp</sub> -T <sub>rmb1</sub> , P <sub>H16_RS30150-pcaQ</sub> -T <sub>luxICDABEG</sub> , P <sub>H16_RS30145-rfp</sub> -T <sub>rmb2</sub>   | This study |
| pEH266 | Cm <sup>r</sup> ; P <sub>H16_RS23655-H16_RS23655-H16_RS23660-9::rfp</sub> -T <sub>dbl</sub>                                                                                                                                               | This study |
| pEH268 | Tet <sup>r</sup> ; P <sub>H16_RS23650-gabR</sub> -T <sub>rmb1</sub> , P <sub>H16_RS23655-H16_RS23655-H16_RS23660-9::rfp</sub> -T <sub>dbl</sub>                                                                                           | This study |
| pEH269 | Tet <sup>r</sup> ; P <sub>H16_RS23655-H16_RS23655-H16_RS23660-9::rfp</sub> -T <sub>dbl</sub>                                                                                                                                              | This study |
| pEH271 | Cm <sup>r</sup> ; P <sub>araC-araC</sub> -T <sub>dbl</sub> , P <sub>araBAD-T7sl-cadA</sub> -T <sub>rmb2</sub> , P <sub>H16_RS01325-oapR</sub> -T <sub>rmb1</sub> , P <sub>H16_RS01330-rfp</sub> -T <sub>dbl</sub>                         | This study |
| pEH272 | Cm <sup>r</sup> ; P <sub>araC-araC</sub> -T <sub>dbl</sub> , P <sub>araBAD-T7sl-panD<sub>E.coli</sub></sub> -T <sub>rmb2</sub> , P <sub>H16_RS01325-oapR</sub> -T <sub>rmb1</sub> , P <sub>H16_RS01330-rfp</sub> -T <sub>dbl</sub>        | This study |
| pEH273 | Cm <sup>r</sup> ; P <sub>araC-araC</sub> -T <sub>dbl</sub> , P <sub>araBAD-T7sl-panD<sub>C.necator</sub></sub> -T <sub>rmb2</sub> , P <sub>H16_RS01325-oapR</sub> -T <sub>rmb1</sub> , P <sub>H16_RS01330-rfp</sub> -T <sub>dbl</sub>     | This study |
| pEH274 | Cm <sup>r</sup> ; P <sub>araC-araC</sub> -T <sub>dbl</sub> , P <sub>araBAD-T7sl-panD<sub>C.glutamicum</sub></sub> -T <sub>rmb2</sub> , P <sub>H16_RS01325-oapR</sub> -T <sub>rmb1</sub> , P <sub>H16_RS01330-rfp</sub> -T <sub>dbl</sub>  | This study |
| pEH275 | Cm <sup>r</sup> ; P <sub>araC-araC</sub> -T <sub>dbl</sub> , P <sub>araBAD-T7sl-panD<sub>P.aeruginosa</sub></sub> -T <sub>rmb2</sub> , P <sub>H16_RS01325-oapR</sub> -T <sub>rmb1</sub> , P <sub>H16_RS01330-rfp</sub> -T <sub>dbl</sub>  | This study |
| pEH276 | Cm <sup>r</sup> ; P <sub>araC-araC</sub> -T <sub>dbl</sub> , P <sub>araBAD-T7sl-panD<sub>Synechocystis</sub></sub> -T <sub>rmb2</sub> , P <sub>H16_RS01325-oapR</sub> -T <sub>rmb1</sub> , P <sub>H16_RS01330-rfp</sub> -T <sub>dbl</sub> | This study |
| pEH277 | Cm <sup>r</sup> ; P <sub>araC-araC</sub> -T <sub>dbl</sub> , P <sub>araBAD-T7sl-panD<sub>B.megaterium</sub></sub> -T <sub>rmb2</sub> , P <sub>H16_RS01325-oapR</sub> -T <sub>rmb1</sub> , P <sub>H16_RS01330-rfp</sub> -T <sub>dbl</sub>  | This study |

---

Supplementary Table 10. Autosampler programming instructions for automatic derivatisation of amino acids with OPA.

1. Draw 50  $\mu$ L from sample vial
2. Dispense into prep vial
3. Draw 50  $\mu$ L from reagent vial (OPA reagent)
4. Dispense into prep vial
5. Wait 2 min
6. Inject 5  $\mu$ L

Supplementary Table 11. Gradient program for HPLC analysis of derivatised amino acids.

| Time (min) | A (%) | B (%) |
|------------|-------|-------|
| 0          | 97    | 3     |
| 20         | 40    | 60    |
| 23         | 97    | 3     |

## References

1. Mitchell, R. J. & Gu, M. B. Construction and evaluation of *nagR-nagAa::lux* fusion strains in biosensing for salicylic acid derivatives. *Appl. Biochem. Biotechnol.* **120**, 183-197 (2005).
2. Zhang, D. *et al.* Characterization and modeling of transcriptional cross-regulation in *Acinetobacter baylyi* ADP1. *ACS Synth. Biol.* **1**, 274-283 (2012).
3. Xue, H. *et al.* Design, construction, and characterization of a set of biosensors for aromatic compounds. *ACS Synth. Biol.* **3**, 1011-1014 (2014).
4. Cebolla, A., Sousa, C. & de Lorenzo, V. Effector specificity mutants of the transcriptional activator NahR of naphthalene degrading *Pseudomonas* define protein sites involved in binding of aromatic inducers. *J. Biol. Chem.* **272**, 3986-3992 (1997).
5. Calero, P., Jensen, S. I. & Nielsen, A. T. Broad-host-range ProUSER vectors enable fast characterization of inducible promoters and optimization of *p*-coumaric acid production in *Pseudomonas putida* KT2440. *ACS Synth. Biol.* **5**, 741-753 (2016).
6. van Sint Fiet, S., van Beilen, J. B. & Witholt, B. Selection of biocatalysts for chemical synthesis. *Proc. Natl. Acad. Sci. USA* **103**, 1693-1698 (2006).
7. Uchiyama, T. & Miyazaki, K. Product-induced gene expression, a product-responsive reporter assay used to screen metagenomic libraries for enzyme-encoding genes. *Appl. Environ. Microbiol.* **76**, 7029-7035 (2010).
8. Hanko, E. K. R., Minton, N. P. & Malys, N. Characterisation of a 3-hydroxypropionic acid-inducible system from *Pseudomonas putida* for orthogonal gene expression control in *Escherichia coli* and *Cupriavidus necator*. *Sci. Rep.* **7**, 1724 (2017).
9. Nguyen, N. H., Kim, J.-R. & Park, S. Development of Biosensor for 3-Hydroxypropionic Acid. *Biotechnol. Bioprocess Eng.* **24**, 109-118 (2019).
10. Liu, Y. *et al.* Biosensor-based evolution and elucidation of a biosynthetic pathway in *Escherichia coli*. *ACS Synth. Biol.* **6**, 837-848 (2017).
11. Mahr, R., von Boeselager, R. F., Wiechert, J. & Frunzke, J. Screening of an *Escherichia coli* promoter library for a phenylalanine biosensor. *Appl. Microbiol. Biotechnol.* **100**, 6739-6753 (2016).
12. Chou, H. H. & Keasling, J. D. Programming adaptive control to evolve increased metabolite production. *Nat. Commun.* **4**, 2595 (2013).
13. Jha, R. K., Chakraborti, S., Kern, T. L., Fox, D. T. & Strauss, C. E. Rosetta comparative modeling for library design: engineering alternative inducer specificity in a transcription factor. *Proteins: Struct. Funct. Bioinform.* **83**, 1327-1340 (2015).
14. Jha, R. K. *et al.* A protocatechuate biosensor for *Pseudomonas putida* KT2440 via promoter and protein evolution. *Metab. Eng. Commun.* **6**, 33-38 (2018).
15. Jha, R. K., Kern, T. L., Fox, D. T. & M. Strauss, C. E. Engineering an *Acinetobacter* regulon for biosensing and high-throughput enzyme screening in *E. coli* via flow cytometry. *Nucleic Acids Res.* **42**, 8150-8160 (2014).
16. Alagesan, S. *et al.* Functional genetic elements for controlling gene expression in *Cupriavidus necator* H16. *Appl. Environ. Microbiol.* **84**, e00878-18 (2018).
17. Hoffmann, J. & Altenbuchner, J. Functional characterization of the mannitol promoter of *Pseudomonas fluorescens* DSM 50106 and its application for a mannitol-inducible expression system for *Pseudomonas putida* KT2440. *PLoS ONE* **10**, e0133248 (2015).
18. Lefebvre, M. D. & Valvano, M. A. Construction and evaluation of plasmid vectors optimized for constitutive and regulated gene expression in *Burkholderia cepacia* complex isolates. *Appl. Environ. Microbiol.* **68**, 5956-5964 (2002).
